# Supplementary material for: Diffusion-enhanced characterization of 3D chromatin structure reveals its linkage to gene regulatory networks and the interactome
Source: PubMed Central journal article supplement — Genome Res. 2023 Aug;33(8):1354–68. doi: 10.1101/gr.277737.123 (PMC10547250; doi:10.1101/gr.277737.123), 2023-08
Supplement: Supplemental_Fig_S1.pdf [file Supplemental_Fig_S1.pdf]

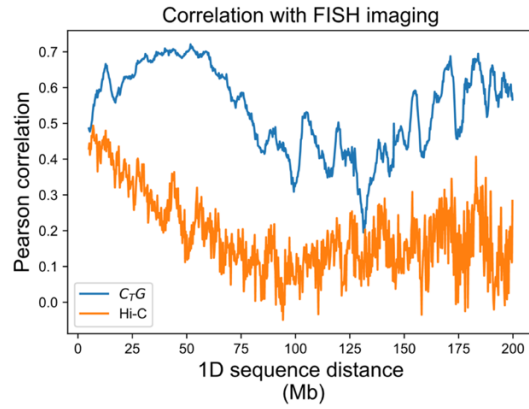

**Supplemental Fig S1.** The Pearson correlation coefficients between the imaging spatial distance matrix and C<sub>T</sub>G distance (blue) and Hi-C (orange) at different 1D genomic distance
