# Supplementary material for: Diffusion-enhanced characterization of 3D chromatin structure reveals its linkage to gene regulatory networks and the interactome
Source: PubMed Central journal article supplement — Genome Res. 2023 Aug;33(8):1354–68. doi: 10.1101/gr.277737.123 (PMC10547250; doi:10.1101/gr.277737.123), 2023-08
Supplement: Supplemental_Fig_S3.pdf [file Supplemental_Fig_S3.pdf]

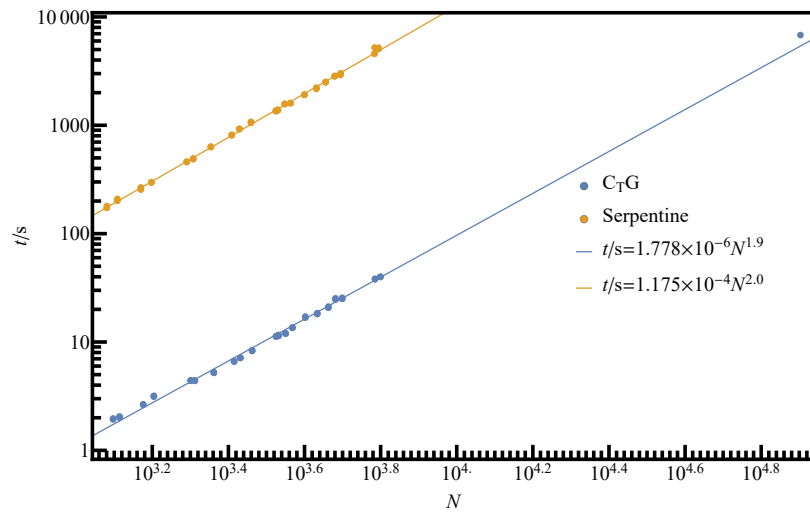

**Supplemental Fig S3.** The computational cost of C<sub>TG</sub> and Serpentine. The C<sub>TG</sub> algorithm is performed on NVIDIA GeForce RTX 3060 Laptop, Intel(R) Core(TM) i7-11800H @ 2.30 GHz. Serpentine is performed on PC workstation with 128G RAM and with Intel(R) Xeon(R) Silver 4210 CPU @2.20GHz. Serpentine also requires large memory usage (for Chr3, 100 G for Serpentine and 400 Mb for C<sub>TG</sub>).
