# Supplementary material for: Diffusion-enhanced characterization of 3D chromatin structure reveals its linkage to gene regulatory networks and the interactome
Source: PubMed Central journal article supplement — Genome Res. 2023 Aug;33(8):1354–68. doi: 10.1101/gr.277737.123 (PMC10547250; doi:10.1101/gr.277737.123), 2023-08
Supplement: Supplemental_Fig_S5.pdf [file Supplemental_Fig_S5.pdf]

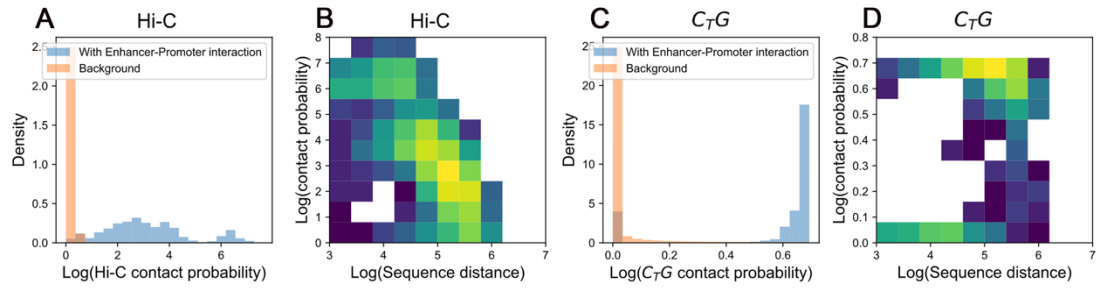

**Supplemental Fig S5.** (A) The distribution of Hi-C contact probability for genomic loci with related enhancer-promoter interactions and the control background (all genomic loci). (B) The distribution of Hi-C contact probability at different 1D sequence distance. (C) The distribution of C<sub>7</sub>G contact probability for genomic loci with related enhancer-promoter interactions and the control background (all genomic loci). (D) The distribution of C<sub>7</sub>G contact probability at different 1D sequence distance.
