# Supplementary material for: Diffusion-enhanced characterization of 3D chromatin structure reveals its linkage to gene regulatory networks and the interactome
Source: PubMed Central journal article supplement — Genome Res. 2023 Aug;33(8):1354–68. doi: 10.1101/gr.277737.123 (PMC10547250; doi:10.1101/gr.277737.123), 2023-08
Supplement: Supplemental_Fig_S6.pdf [file Supplemental_Fig_S6.pdf]

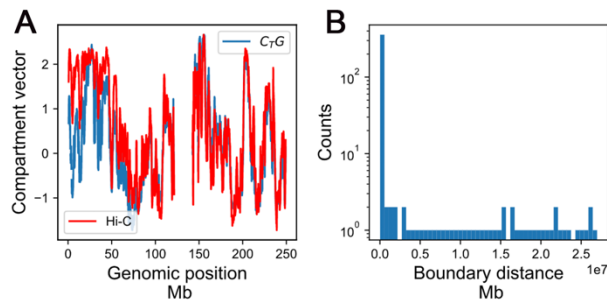

**Supplemental Fig S6.** (A) The compartment vector derived from C<sub>T</sub>G distance matrix (blue) and Hi-C contact matrix (red) by performing PCA. The correlation coefficient reaches 0.890. (B) The genomic distance between TAD boundaries found in CTG distance matrix and those found in Hi-C contact matrix. We used KMeans to find TADs in C<sub>T</sub>G distance matrix, compared with the TADs found by HiCExplore, the boundaries generated from two methods are very close.
