# Supplementary material for: Diffusion-enhanced characterization of 3D chromatin structure reveals its linkage to gene regulatory networks and the interactome
Source: PubMed Central journal article supplement — Genome Res. 2023 Aug;33(8):1354–68. doi: 10.1101/gr.277737.123 (PMC10547250; doi:10.1101/gr.277737.123), 2023-08
Supplement: Supplemental_Fig_S7.pdf [file Supplemental_Fig_S7.pdf]

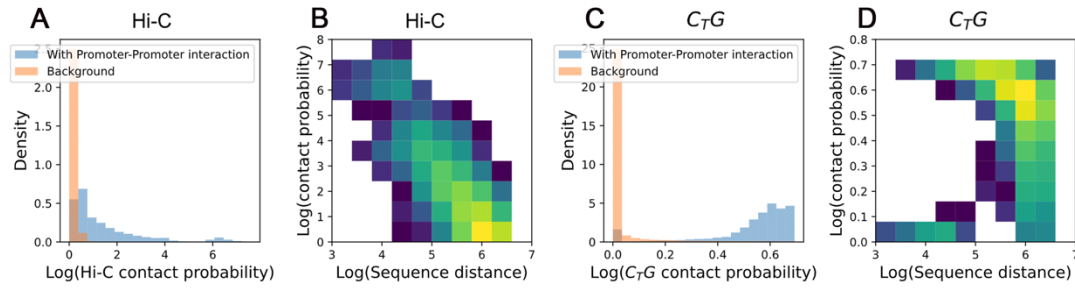

**Supplemental Fig S7** (A) The distribution of Hi-C contact probability for genomic loci with related promoter-promoter interactions and the control background (using GRCh38 assembly). (B) The distribution of Hi-C contact probability at different 1D sequence distance (using GRCh38 assembly). (C) The distribution of C<sub>7</sub>G contact probability for genomic loci with related promoter-promoter interactions and the control background (using GRCh38 assembly). (D) The distribution of C<sub>7</sub>G contact probability at different 1D sequence distance (using GRCh38 assembly).
