# Supplementary material for: Diffusion-enhanced characterization of 3D chromatin structure reveals its linkage to gene regulatory networks and the interactome
Source: PubMed Central journal article supplement — Genome Res. 2023 Aug;33(8):1354–68. doi: 10.1101/gr.277737.123 (PMC10547250; doi:10.1101/gr.277737.123), 2023-08
Supplement: Supplemental_Fig_S9.pdf [file Supplemental_Fig_S9.pdf]

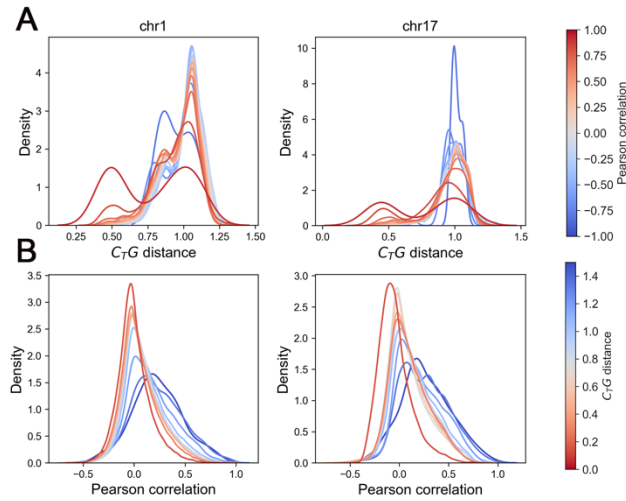

**Supplemental Fig S9. Correspondence of gene-gene proximity and RNA co-regulation in leukemia.** (A) The distribution of transcriptional Pearson correlation under different C<sub>T</sub>G distance of chromosome 1(left) and chromosome 17(right), the color of each line indicates the corresponding C<sub>T</sub>G distance. (B) The distribution of C<sub>T</sub>G distance under different Pearson correlation of chromosome 1(left) and chromosome 17(right), the color of each line indicates corresponding Pearson correlation coefficient.
