# Supplementary material for: Diffusion-enhanced characterization of 3D chromatin structure reveals its linkage to gene regulatory networks and the interactome
Source: PubMed Central journal article supplement — Genome Res. 2023 Aug;33(8):1354–68. doi: 10.1101/gr.277737.123 (PMC10547250; doi:10.1101/gr.277737.123), 2023-08
Supplement: Supplemental_Fig_S10.pdf [file Supplemental_Fig_S10.pdf]

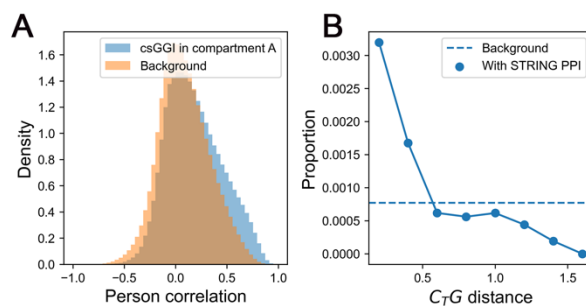

**Supplemental Fig S10. (A)** The distribution of correlation of gene pairs with csGGIs and overall background in compartment A. **(B)** The proportion of intra-chromosomal gene pairs with STRING PPI at different  $C_{TG}$  distances in compartment A. The proportion refers to number of gene pairs with PPIs at fixed  $C_{TG}$  distance /number of all gene pairs at fixed  $C_{TG}$  distance. The background refers to number of gene pairs with PPIs/number of all gene pairs at all  $C_{TG}$  distance.
