# Supplementary material for: Diffusion-enhanced characterization of 3D chromatin structure reveals its linkage to gene regulatory networks and the interactome
Source: PubMed Central journal article supplement — Genome Res. 2023 Aug;33(8):1354–68. doi: 10.1101/gr.277737.123 (PMC10547250; doi:10.1101/gr.277737.123), 2023-08
Supplement: Supplemental_Fig_S14.pdf [file Supplemental_Fig_S14.pdf]

## Supplemental Methods

### Overall design of C<sub>T</sub>G

The Hi-C contact map depicts a proximity network  $G(V,E)$ , where the vertices  $V=\{v_1, v_2, \dots, v_n\}$  denote the non-overlapping genomic regions and the edges  $E = \{e_{i,j}\}$  denote the contact strength between pairwise connected genomic regions. Similar to diffusion-based methods for network denoising (1, 2), a Markov process (3) is used to describe the diffusion process on this network.  $D_{i,i} = \sum_{j=1}^n e_{i,j}$ , is the element of the diagonal degree matrix  $D$  for the network. The vector  $P_i^{(1)} = \{P_{i,1}^{(1)}, P_{i,2}^{(1)}, \dots, P_{i,n}^{(1)}\}$  is the conditional transition probability transiting from vertex  $v_i$  to  $V=\{v_1, v_2, \dots, v_n\}$  in one single step. Likewise,  $P_i^{(k)} = \{P_{i,1}^{(k)}, P_{i,2}^{(k)}, \dots, P_{i,n}^{(k)}\}$  is the conditional transition probability in  $k$  steps and  $P_{i,j}^{(k)} = \sum_{p=1}^n P_{i,p}^{(k-1)} P_{p,j}^{(k-1)}$ . With increasing  $k$ , the transition probability from  $v_i$  to  $v_j$  gradually integrates neighbor information and expand the inclusion of edges, since  $v_i$  and  $v_j$  may not be connected in one step but they can be connected in some finite steps as the network  $G$  is a connected graph. Taking  $k=2$  and  $P_{i,j}^{(2)} = \sum_{p=1}^n P_{i,p}^{(1)} P_{p,j}^{(1)}$  as an example, when the two pairs of vertices ( $v_i$  and  $v_p$ ,  $v_j$  and  $v_p$ ) are pairwise neighbors, which means  $P_{i,p}^{(1)} \neq 0$  and  $P_{p,j}^{(1)} \neq 0$ ,  $v_p$  contributes to  $P_{i,j}^{(2)}$ .  $P_i^{(k)}$  converges to an invariant distribution for connected graph and the difference between  $P_i^{(k-1)}$  and  $P_i^{(k)}$  decreases.

It is thus appropriate to use the integrated information on  $\{P_i^{(1)}, P_i^{(2)}, \dots, P_i^{(k)}\}$  to describe the diffusion manner of vertex  $v_i$  within some given number of  $k$  steps, which can be infinite. In practice, we found that  $P_i^{(k)}$  converges rapidly and therefore used the exponential decay to fit the convergence.  $S_i^{(k)}$  is defined as the weighted summation of  $P_i^{(t)}$  ( $1 \leq t \leq k$ ) :

$$S_i^{(k)} = \sum_{t=1}^k \exp(-\alpha t) P_i^{(t)}$$

When  $k$  reaches infinity,  $S_i^{(k)}$  converges to  $S_i$  (Supplementary note). As the weighted summation of  $P_i^{(t)}$ ,  $S_i$  naturally integrates neighbor information of the connected graph and therefore alleviates in a physics-based manner the problems caused by the Hi-C

data sparsity. On the other hand, the exponential decay ensures that the integration does not eliminate the distinction of each vertex, taking the rapid convergence of  $P_i^{(k)}$  into consideration.

The physical succession of the genomic structure suggests that the proximal genomic regions should share similar diffusion manners. The similarity between pairwise vertices  $v_i$  and  $v_j$  is quantified by L1 distance between  $S_i$  and  $S_j$ . L1 distance is used as a measure since it mitigates the impact of outliers caused by distance matrices of higher-order terms. A C<sub>T</sub>G distance matrix is then constructed based on the Hi-C contact map.

### Proof 1

Eigenvalues  $\Lambda$  of the P are within the range of [-1,1].

For any eigenvector X of P:

$$PX = \lambda X$$

The maximum element of X is denoted as  $x_{max}$ , and the minimum element of X is denoted as  $x_{min}$ . As the row summation of P is normalized to 1, and P is positive,

$$x_{min} \leq \lambda x_{min} \leq x_{max}$$

$$x_{min} \leq \lambda x_{max} \leq x_{max}$$

Therefore,

$$-1 \leq \lambda x_{max} \leq 1$$

### Proof 2

When n approaches infinity, the transition propensity matrix  $M^{(n)}$  is convergent.

P is diagonalizable:

$$P(\vec{v}_1, \vec{v}_2, \dots, \vec{v}_m) = (\lambda_1 \vec{v}_1, \lambda_2 \vec{v}_2, \dots, \lambda_m \vec{v}_m) = (\vec{v}_1, \vec{v}_2, \dots, \vec{v}_m) \begin{bmatrix} \lambda_1 & \dots & 0 \\ \vdots & \ddots & \vdots \\ 0 & \dots & \lambda_m \end{bmatrix}$$

$$P^{(1)} = U^{-1} \Lambda U$$

$P^{(k)}$  can be written as:

$$P^{(k)} = P^k = U^{-1} \Lambda U$$

$S^{(n)}$  is the weighted summation of  $P^{(k)}$ :

$$S^{(n)} = \sum_{k=1}^n \exp(-\alpha k) U^{-1} \Lambda^k U = \sum_{k=1}^n U^{-1} [\exp(-\alpha k) \Lambda^k] U$$

According to the associative law of multiplication:

$$S^{(n)} = U^{-1} \sum_{k=1}^n [\exp(-\alpha k) \Lambda^k] U = U^{-1} \left[ \sum_{k=1}^n \exp(-\alpha k) \Lambda^k \right] U$$

When n approaches infinity, we have

$$S = U^{-1} \left[ \lim_{n \rightarrow \infty} \sum_{k=1}^n \exp(-\alpha k) \Lambda^k \right] U$$

In the above equation,  $\exp(-ak) \Lambda^k$  is a geometric progression, and

$$\lim_{n \rightarrow \infty} \exp(-ak) \Lambda^k \rightarrow 0$$

Therefore, the summation over  $\exp(-ak) \Lambda^k$  is convergent when

$$\rho(P) < \exp(a), \rho(P) = \max |\lambda_i|$$

As  $\rho(P) < 1$  and  $\exp(a) > \exp(0) > 1$ :

$$\lim_{n \rightarrow \infty} \sum_{k=1}^n \exp(-ak) \Lambda^k = \Lambda [\exp(a)I - \Lambda]^{-1}$$

$I$  denotes the identity matrix.

$S$  is then also convergent and

$$S = U^{-1} \Lambda [\exp(a)I - \Lambda]^{-1} U$$

1. Wang,B., Pourshafeie,A., Zitnik,M., Zhu,J., Bustamante,C.D., Batzoglou,S. and Leskovec,J. (2018) Network enhancement as a general method to denoise weighted biological networks. *Nat. Commun.*, **9**.
2. Cao,M., Zhang,H., Park,J., Daniels,N.M., Crovella,M.E., Cowen,L.J. and Hescott,B. (2013) Going the Distance for Protein Function Prediction: A New Distance Metric for Protein Interaction Networks. *PLoS One*, **8**, e76339.
3. Stochastic Processes in Physics and Chemistry (2007) Elsevier.
4. Halverson,J.D., Smrek,J., Kremer,K. and Grosberg,A.Y. (2014) From a melt of rings to chromosome territories: The role of topological constraints in genome folding. *Reports Prog. Phys.*, **77**.
5. Lieberman-Aiden,E., van Berkum,N.L., Williams,L., Imakaev,M., Ragozy,T., Telling,A., Amit,I., Lajoie,B.R., Sabo,P.J., Dorschner,M.O., *et al.* (2009) Comprehensive Mapping of Long-Range Interactions Reveals Folding Principles of the Human Genome. *Science*, **326**, 289–293.

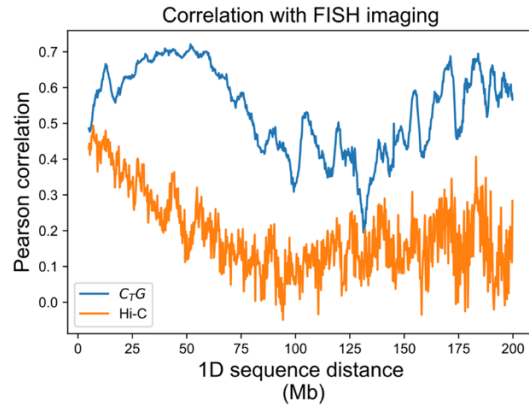

**Supplemental Fig S1.** The Pearson correlation coefficients between the imaging spatial distance matrix and C<sub>T</sub>G distance (blue) and Hi-C (orange) at different 1D genomic distance

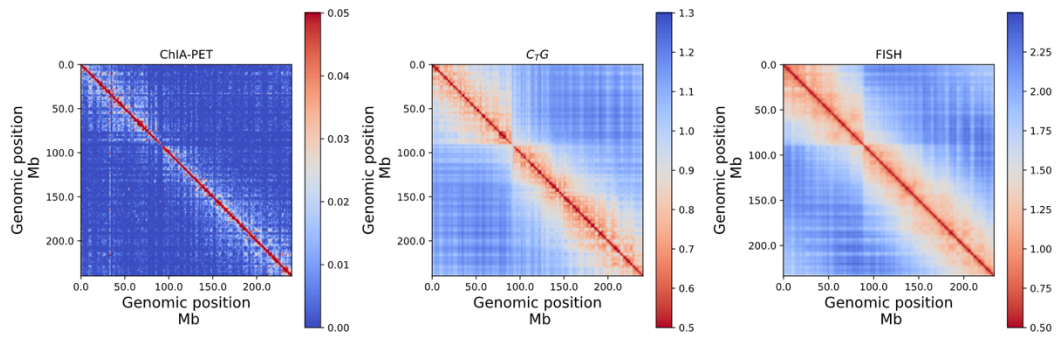

**Supplemental Fig S2.** The ChIA-PET contact map(left), C<sub>T</sub>G distance matrix (middle) and the median spatial distance matrix (right) of chr2 (resolution of 50kb)

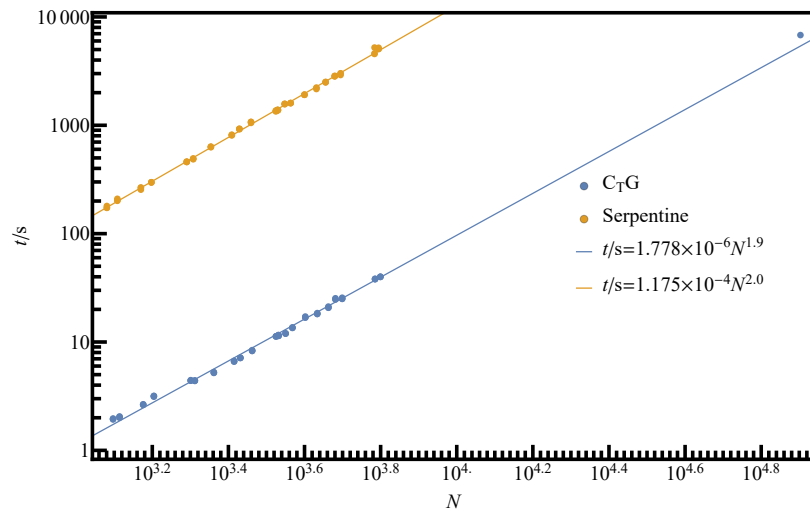

**Supplemental Fig S3.** The computational cost of C<sub>TG</sub> and Serpentine. The C<sub>TG</sub> algorithm is performed on NVIDIA GeForce RTX 3060 Laptop, Intel(R) Core(TM) i7-11800H @ 2.30 GHz. Serpentine is performed on PC workstation with 128G RAM and with Intel(R) Xeon(R) Silver 4210 CPU @2.20GHz. Serpentine also requires large memory usage (for Chr3, 100 G for Serpentine and 400 Mb for C<sub>TG</sub>).

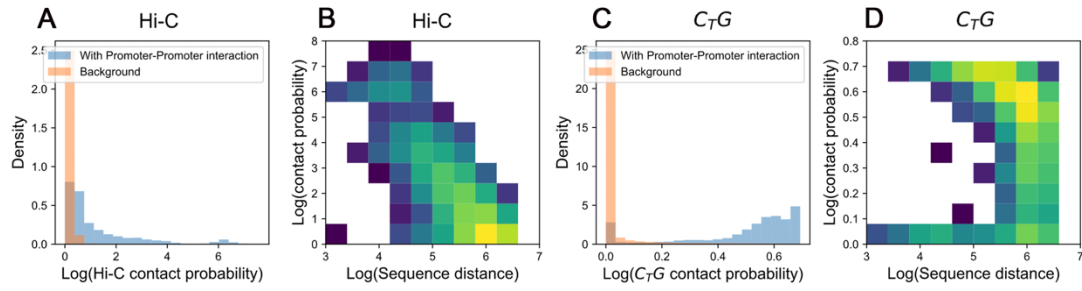

**Supplemental Fig S4** (A) The distribution of Hi-C contact probability for genomic loci with related promoter-promoter interactions and the control background (using hg19 assembly). (B) The distribution of Hi-C contact probability at different 1D sequence distance (using hg19 assembly). (C) The distribution of C<sub>T</sub>G contact probability for genomic loci with related promoter-promoter interactions and the control background (using hg19 assembly). (D) The distribution of C<sub>T</sub>G contact probability at different 1D sequence distance (using hg19 assembly).

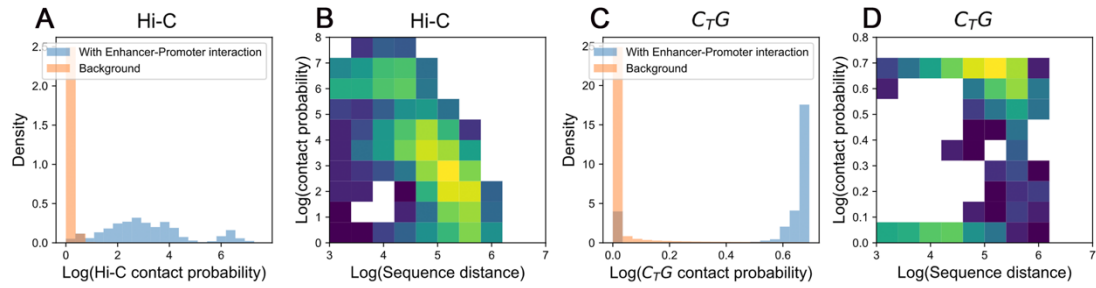

**Supplemental Fig S5.** (A) The distribution of Hi-C contact probability for genomic loci with related enhancer-promoter interactions and the control background (all genomic loci). (B) The distribution of Hi-C contact probability at different 1D sequence distance. (C) The distribution of C<sub>7</sub>G contact probability for genomic loci with related enhancer-promoter interactions and the control background (all genomic loci). (D) The distribution of C<sub>7</sub>G contact probability at different 1D sequence distance.



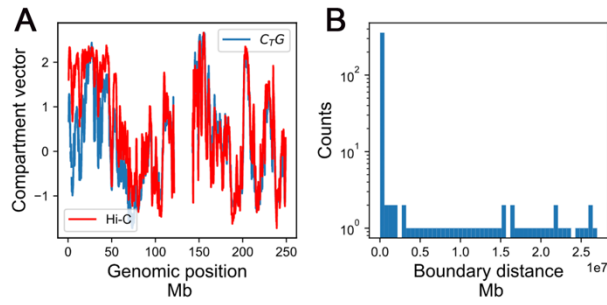

**Supplemental Fig S6.** (A) The compartment vector derived from C<sub>T</sub>G distance matrix (blue) and Hi-C contact matrix (red) by performing PCA. The correlation coefficient reaches 0.890. (B) The genomic distance between TAD boundaries found in CTG distance matrix and those found in Hi-C contact matrix. We used KMeans to find TADs in C<sub>T</sub>G distance matrix, compared with the TADs found by HiCExplore, the boundaries generated from two methods are very close.

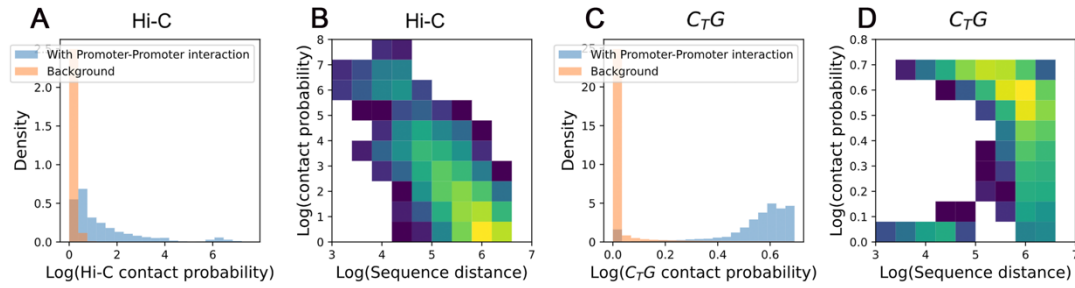

**Supplemental Fig S7** (A) The distribution of Hi-C contact probability for genomic loci with related promoter-promoter interactions and the control background (using GRCh38 assembly). (B) The distribution of Hi-C contact probability at different 1D sequence distance (using GRCh38 assembly). (C) The distribution of C<sub>7</sub>G contact probability for genomic loci with related promoter-promoter interactions and the control background (using GRCh38 assembly). (D) The distribution of C<sub>7</sub>G contact probability at different 1D sequence distance (using GRCh38 assembly).

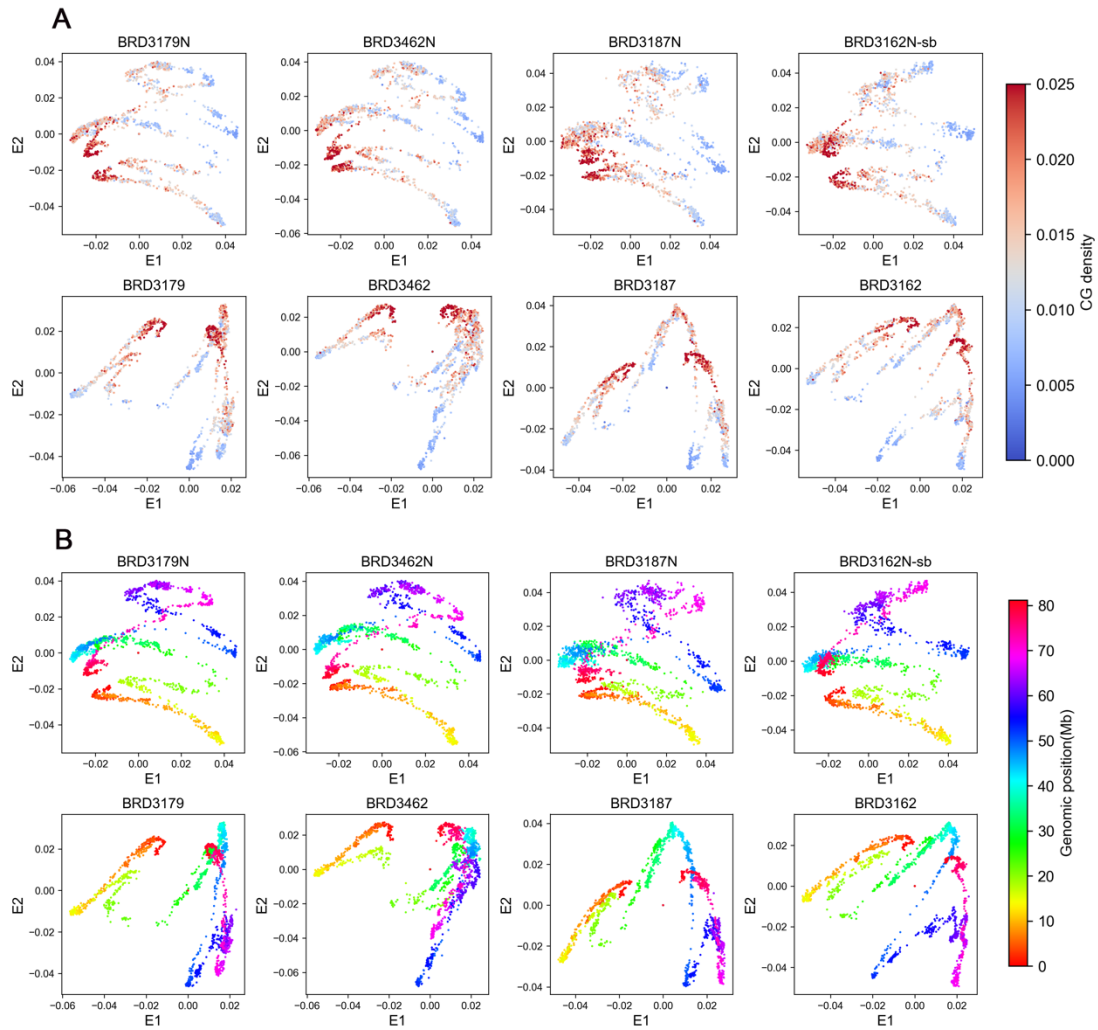

**Supplemental Fig S8. 2D Laplacian eigenmap of colon cancer. (A)** The 2D Laplacian Eigenmaps of  $C_TG$  distance matrices for pairwise normal (upper panel) and tumor (lower panel) colon samples. Each point represents a 40kb genomic region. The color is used to represent the CpG density of the corresponding genomic region. **(B)** The color is used to represent the genomic position of the corresponding genomic region.

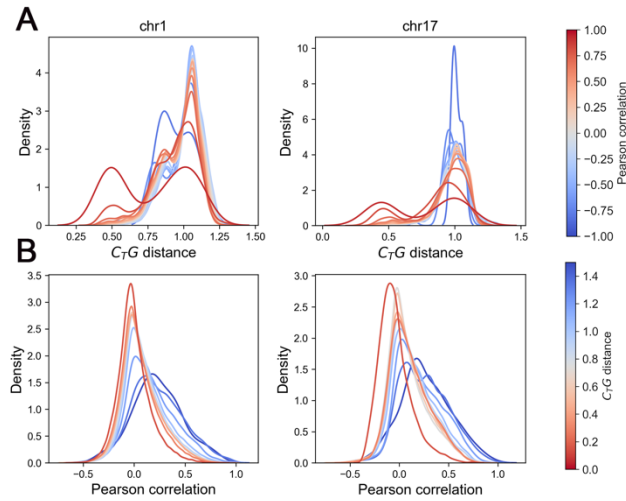

**Supplemental Fig S9. Correspondence of gene-gene proximity and RNA co-regulation in leukemia.** (A) The distribution of transcriptional Pearson correlation under different C<sub>T</sub>G distance of chromosome 1(left) and chromosome 17(right), the color of each line indicates the corresponding C<sub>T</sub>G distance. (B) The distribution of C<sub>T</sub>G distance under different Pearson correlation of chromosome 1(left) and chromosome 17(right), the color of each line indicates corresponding Pearson correlation coefficient.

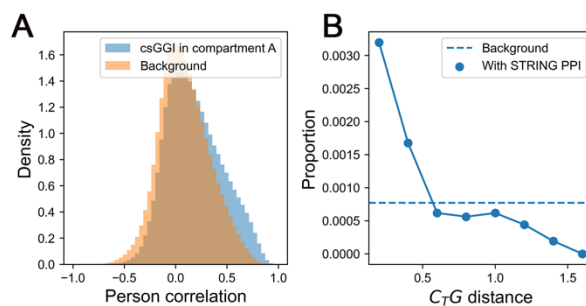

**Supplemental Fig S10. (A)** The distribution of correlation of gene pairs with csGGIs and overall background in compartment A. **(B)** The proportion of intra-chromosomal gene pairs with STRING PPI at different C<sub>T</sub>G distances in compartment A. The proportion refers to number of gene pairs with PPIs at fixed C<sub>T</sub>G distance /number of all gene pairs at fixed C<sub>T</sub>G distance. The background refers to number of gene pairs with PPIs/number of all gene pairs at all C<sub>T</sub>G distance.

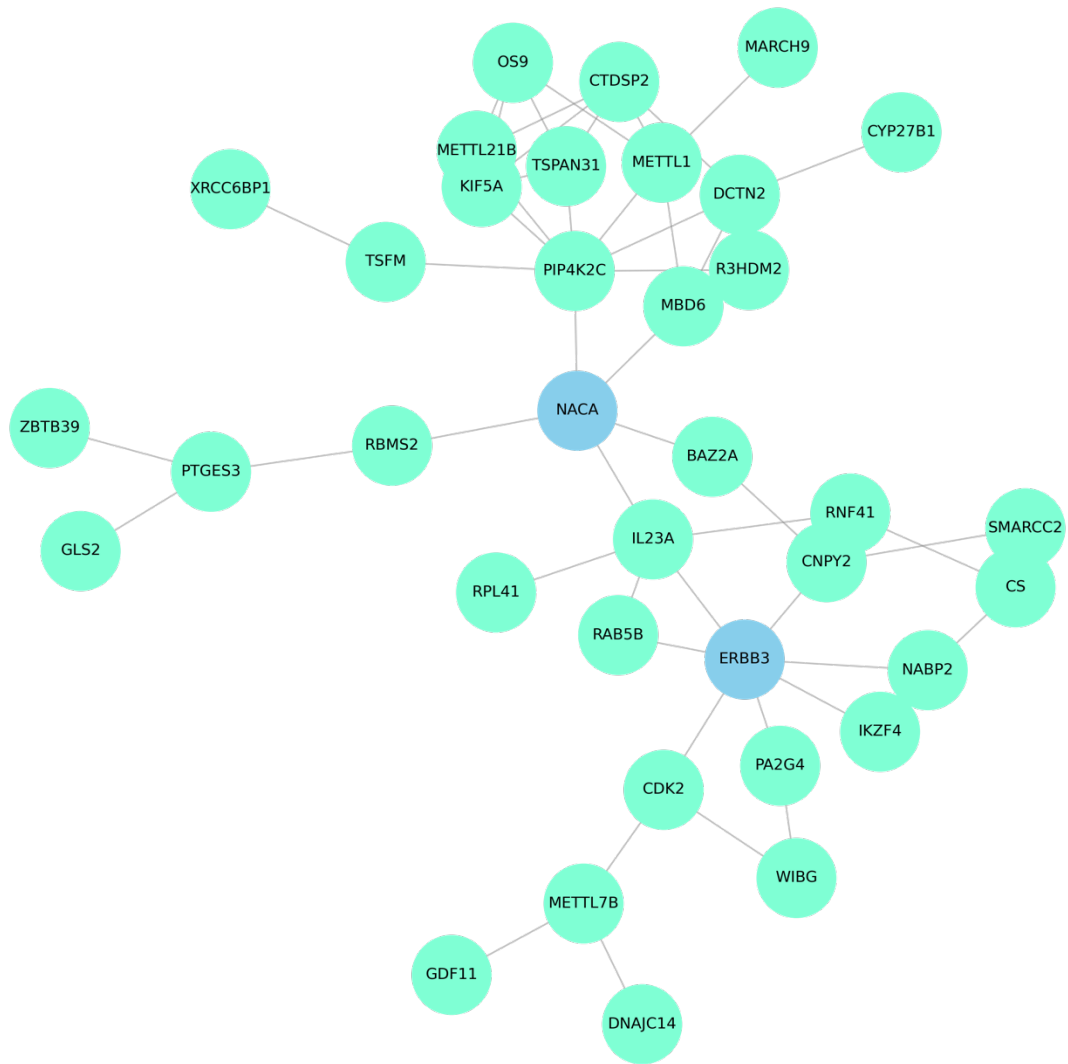

**Supplemental Fig S11. Subgraph of csGGI network with *ERBB3*.**

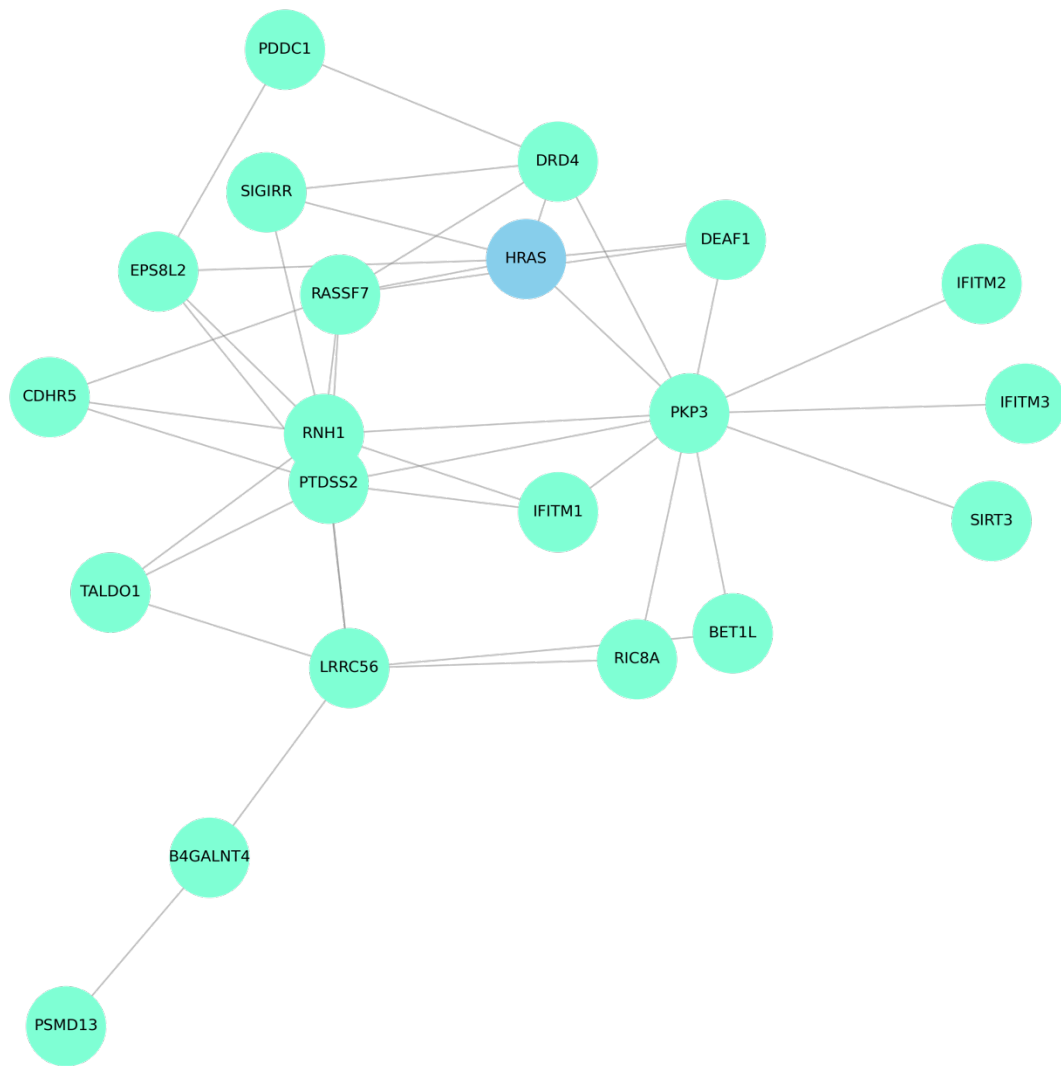

**Supplemental Fig S12. Subgraph of csGGI network with *HRAS*.**

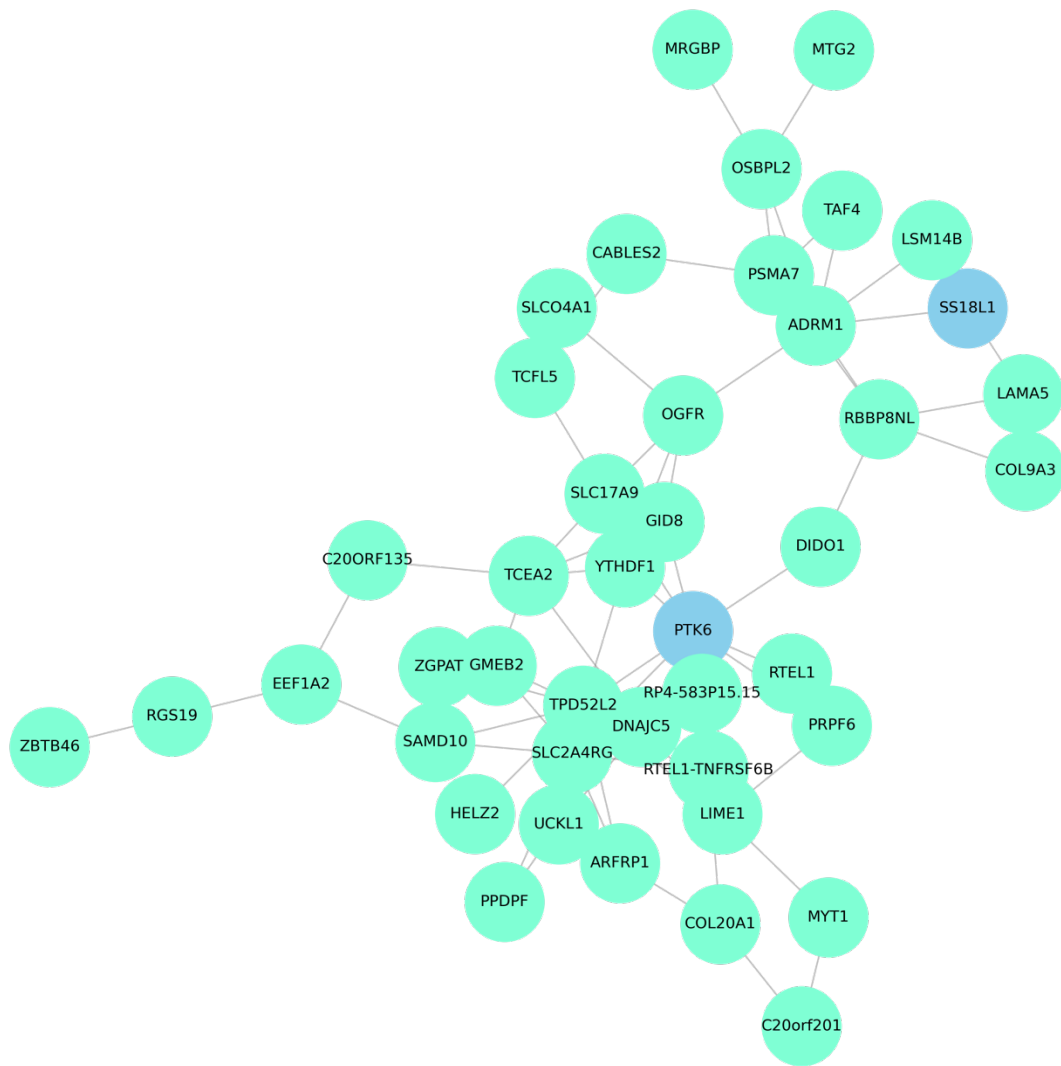

**Supplemental Fig S13. Subgraph of csGGI network with *PTK6*.**



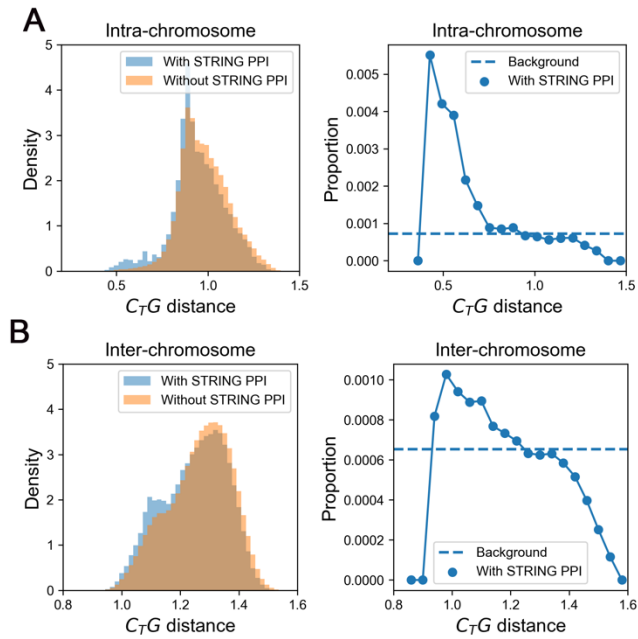

**Supplemental Fig S14. Correspondence of gene-gene proximity and STRING PPIs in normal colon sample.** (A) The distribution of  $C_TG$  distance between intra-chromosomal gene pairs with and without STRING PPIs for whole chromosome in tumor sample (left panel); The proportion of intra-chromosomal gene-pairs with STRING PPI at different  $C_TG$  distances in normal sample (right panel). (B) The distribution of  $C_TG$  distance between inter-chromosomal gene pairs with and without STRING PPIs for whole chromosome in normal sample (left panel); The proportion of inter-chromosomal gene-pairs with STRING PPI at different  $C_TG$  distances in normal sample (right panel).

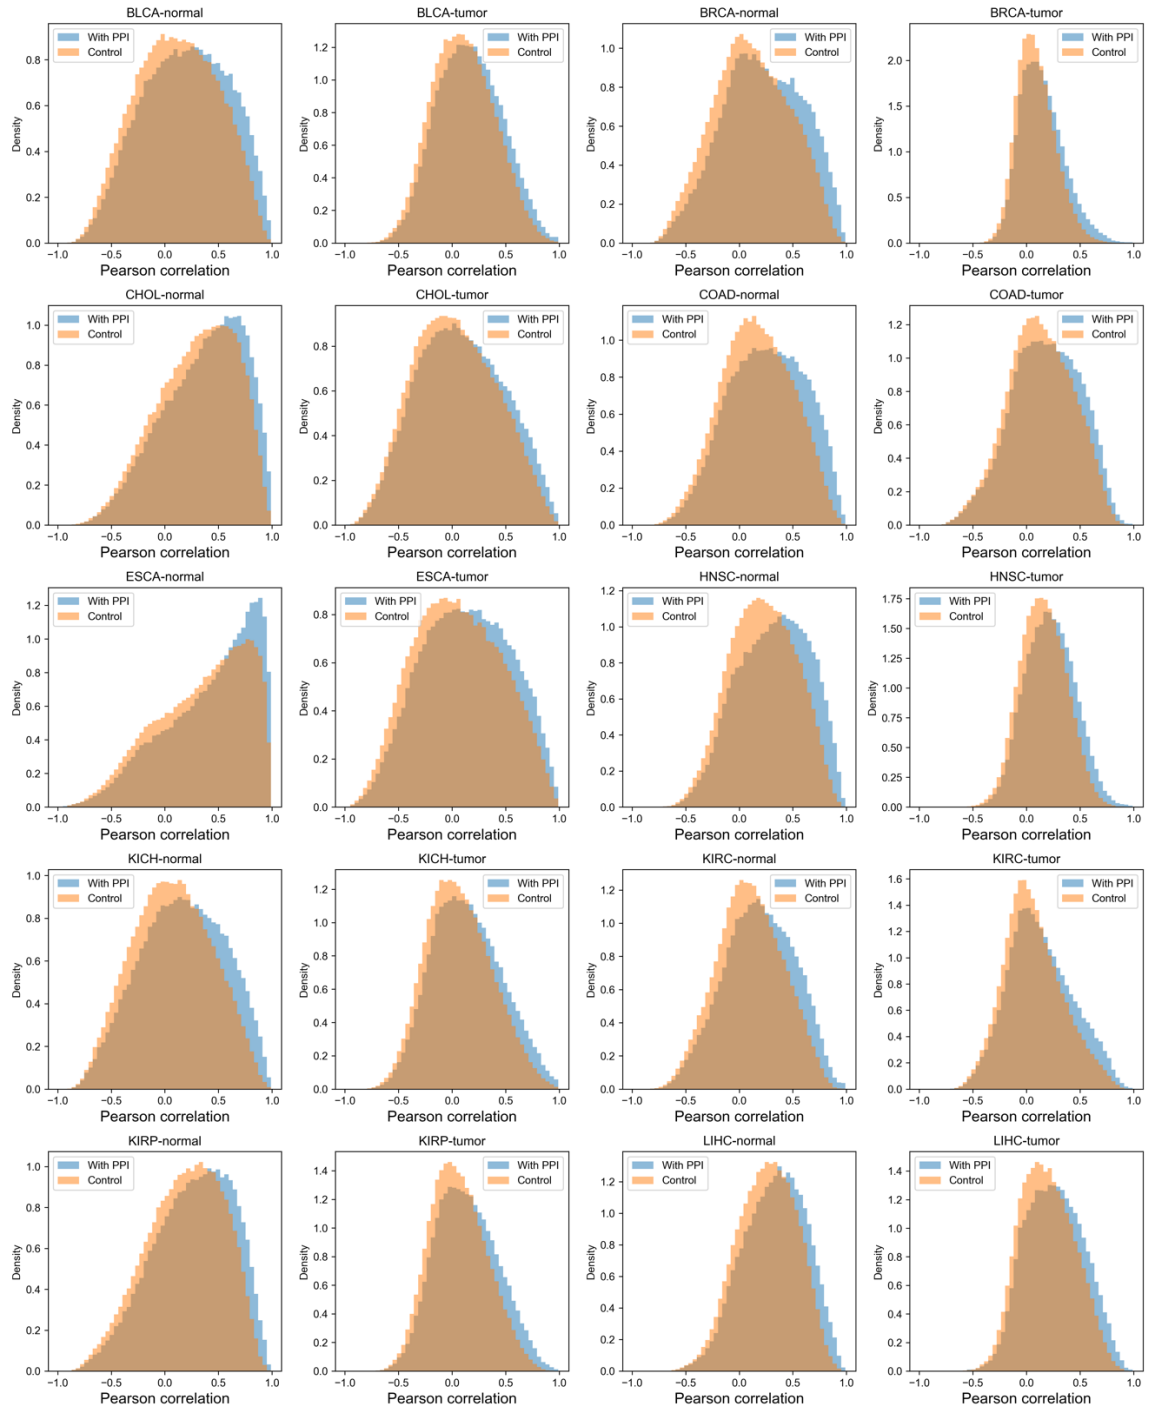

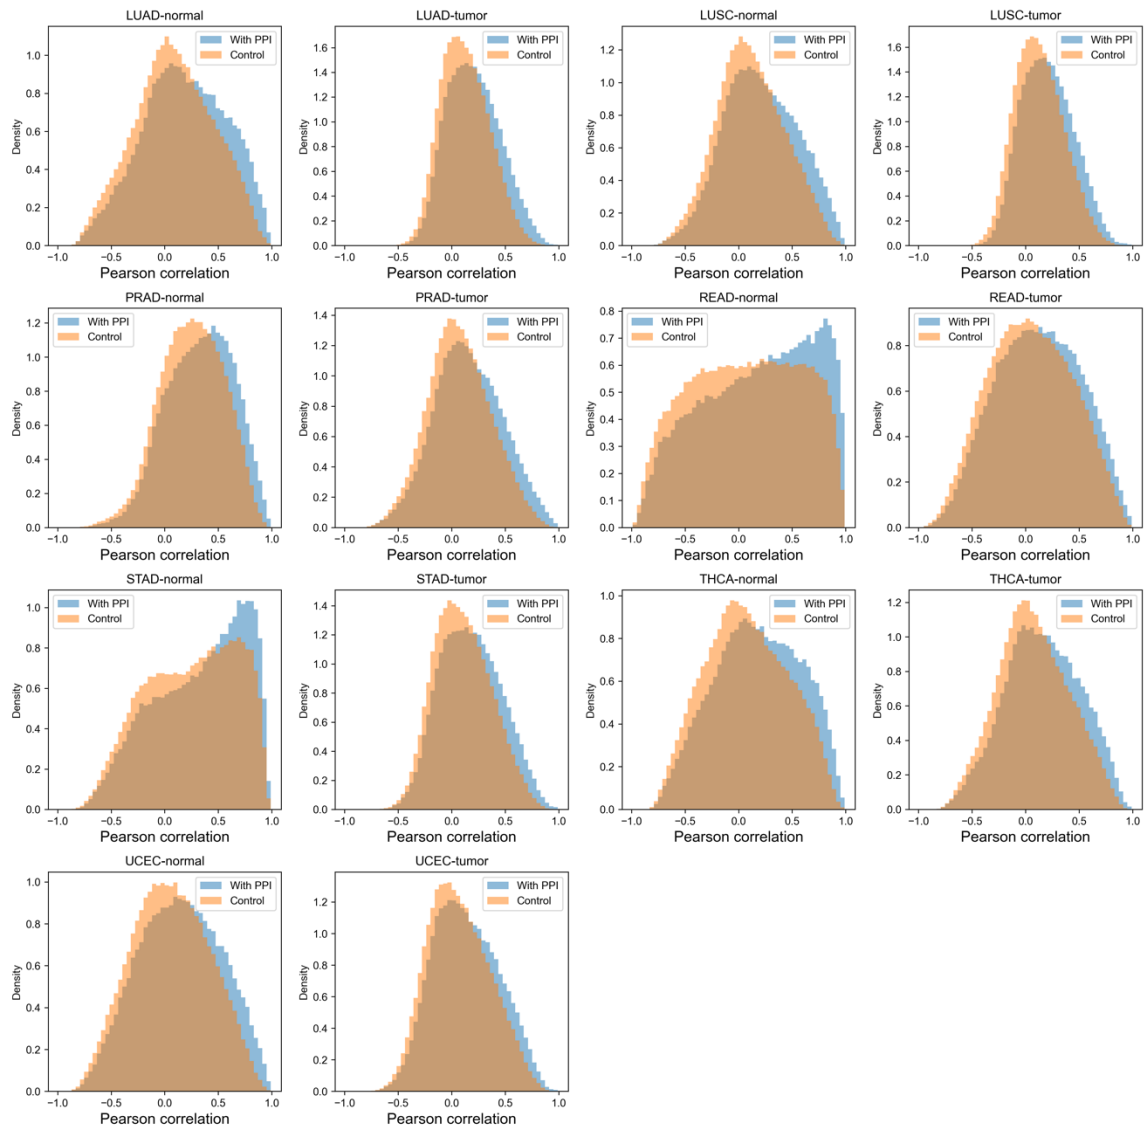

**Supplemental Fig S15. The distribution of RNA correlation with STRING PPI for 17 cancer types.** The distributions of gene pairs with STRING PPI are colored blue and the control groups are colored orange. All samples show similar patterns that gene pairs with STRING PPI are more correlated at transcriptional level.

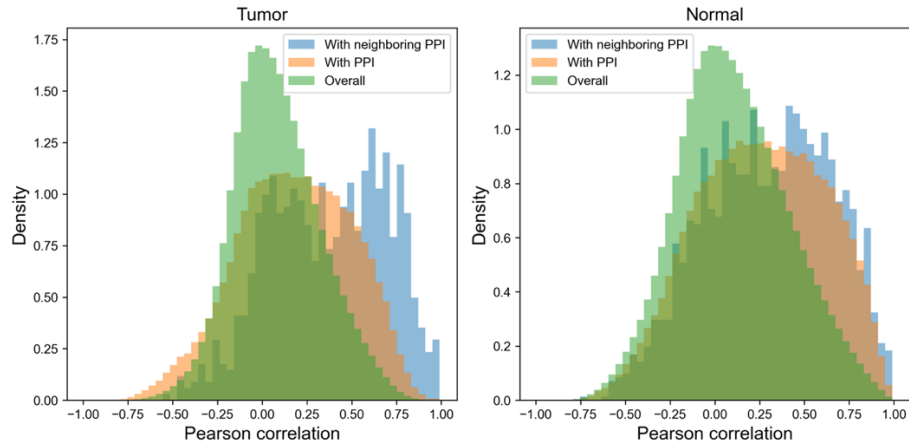

**Supplemental Fig S16. The distribution of RNA correlation for colon cancer.** Gene pairs with both STRING PPI and GGIs are colored blue and gene pairs with only STRING PPI are colored orange and the control group is colored green. Gene-pairs with both STRING PPI and GGIs are more correlated in transcriptional level for both tumor and normal colon samples.

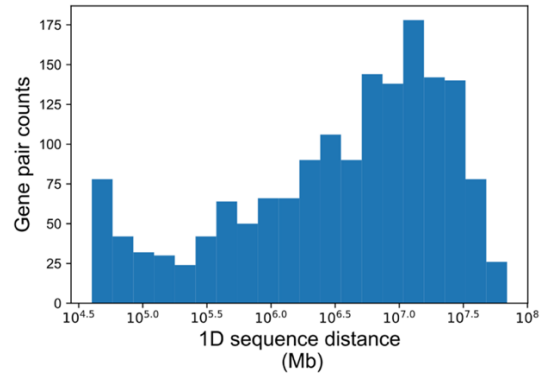

**Supplemental Fig S17.** The distribution of 1D sequence distance of gene pairs integrating gene-gene interplay at DNA, RNA, and protein levels.

**Table S1. Functional annotation clustering of colon csGGIs.**

| Annotation Cluster 1: Enrichment Score: 1.5327833580397092                                    |       |            |            |
|-----------------------------------------------------------------------------------------------|-------|------------|------------|
| Term                                                                                          | Count | PValue     | Benjamini  |
| hsa01521: EGFR tyrosine kinase inhibitor resistance                                           | 7     | 4.63E-05   | 0.00920864 |
| h_pyk2Pathway: Links between Pyk2 and Map Kinases                                             | 5     | 8.51E-05   | 0.00802485 |
| h_at1rPathway: Angiotensin II mediated activation of JNK Pathway via Pyk2 dependent signaling | 5     | 1.65E-04   | 0.00802485 |
| hsa05219: Bladder cancer                                                                      | 5     | 3.55E-04   | 0.03383294 |
| h_malPathway: Role of MAL in Rho-Mediated Activation of SRF                                   | 4     | 5.67E-04   | 0.01608635 |
| hsa04662: B cell receptor signaling pathway                                                   | 6     | 5.77E-04   | 0.03383294 |
| hsa04012: ErbB signaling pathway                                                              | 6     | 6.80E-04   | 0.03383294 |
| h_rasPathway: Ras Signaling Pathway                                                           | 4     | 0.00101341 | 0.0196602  |
| hsa04140: Autophagy - animal                                                                  | 7     | 0.00108928 | 0.03764245 |
| hsa05231: Choline metabolism in cancer                                                        | 6     | 0.00129541 | 0.03764245 |
| hsa04370: VEGF signaling pathway                                                              | 5     | 0.00142489 | 0.03764245 |
| hsa05205: Proteoglycans in cancer                                                             | 8     | 0.00151326 | 0.03764245 |
| h_sam68Pathway: Regulation of Splicing through Sam68                                          | 3     | 0.00163092 | 0.02636658 |
| GO: 2000641~regulation of early endosome to late endosome transport                           | 3     | 0.0017761  | 0.66330982 |
| hsa04810: Regulation of actin cytoskeleton                                                    | 8     | 0.00215053 | 0.04444882 |
| h_erkPathway: Erk1/Erk2 Mapk Signaling pathway                                                | 4     | 0.00223416 | 0.03095906 |
| hsa04664: Fc epsilon RI signaling pathway                                                     | 5     | 0.00241051 | 0.04444882 |
| hsa05211: Renal cell carcinoma                                                                | 5     | 0.00254296 | 0.04444882 |
| hsa04917: Prolactin signaling pathway                                                         | 5     | 0.00268033 | 0.04444882 |
| hsa05223: Non-small cell lung cancer                                                          | 5     | 0.00297021 | 0.04546711 |
| hsa05220: Chronic myeloid leukemia                                                            | 5     | 0.00361302 | 0.05135645 |
| h_metPathway: Signaling of Hepatocyte Growth Factor Receptor                                  | 4     | 0.00379947 | 0.03988317 |
| hsa04650: Natural killer cell mediated cytotoxicity                                           | 6     | 0.00389495 | 0.05167298 |
| h_fm1pPathway: fMLP induced chemokine gene expression in HMC-1 cells                          | 4     | 0.00411167 | 0.03988317 |
| h_integrinPathway: Integrin Signaling Pathway                                                 | 4     | 0.00411167 | 0.03988317 |
| hsa05210: Colorectal cancer                                                                   | 5     | 0.00561992 | 0.06989776 |
| h_cdk5Pathway: Phosphorylation of MEK1 by cdk5/p35 down regulates the MAP kinase pathway      | 3     | 0.00586627 | 0.05172985 |
| hsa04540: Gap junction                                                                        | 5     | 0.00609515 | 0.07134909 |
| Annotation Cluster 2: Enrichment Score: 1.5241353790689698                                    |       |            |            |
| Term                                                                                          | Count | PValue     | Benjamini  |
| GO: 0039702~viral budding via host ESCRT complex                                              | 3     | 0.01072312 | 1          |

|                                                                                                       |       |            |            |
|-------------------------------------------------------------------------------------------------------|-------|------------|------------|
| GO: 0036258~multivesicular body assembly                                                              | 3     | 0.02069957 | 1          |
| GO: 0043162~ubiquitin-dependent protein catabolic process via the multivesicular body sorting pathway | 3     | 0.02069957 | 1          |
| GO: 0090148~membrane fission                                                                          | 3     | 0.03330408 | 1          |
| Annotation Cluster 3: Enrichment Score: 1.453480544316328                                             |       |            |            |
| Term                                                                                                  | Count | PValue     | Benjamini  |
| KW-0653~Protein transport                                                                             | 12    | 0.01295629 | 0.24467061 |
| GO: 0015031~protein transport                                                                         | 8     | 0.0389436  | 1          |
| KW-0967~Endosome                                                                                      | 9     | 0.08642541 | 0.79943504 |
| Annotation Cluster 4: Enrichment Score: 1.444194122407839                                             |       |            |            |
| Term                                                                                                  | Count | PValue     | Benjamini  |
| KW-0648~Protein biosynthesis                                                                          | 6     | 0.00775783 | 0.24467061 |
| KW-0396~Initiation factor                                                                             | 3     | 0.07027195 | 0.71901399 |
| GO: 0003743~translation initiation factor activity                                                    | 3     | 0.08528948 | 1          |
| Annotation Cluster 5: Enrichment Score: 1.3130484622630447                                            |       |            |            |
| Term                                                                                                  | Count | PValue     | Benjamini  |
| GO: 0051402~neuron apoptotic process                                                                  | 5     | 0.001971   | 0.66330982 |
| GO: 0043524~negative regulation of neuron apoptotic process                                           | 4     | 0.10479492 | 1          |
| Annotation Cluster 6: Enrichment Score: 1.2661570708970376                                            |       |            |            |
| Term                                                                                                  | Count | PValue     | Benjamini  |
| GO: 0097542~ciliary tip                                                                               | 4     | 0.00441052 | 0.19343661 |
| GO: 0005813~centrosome                                                                                | 11    | 0.00465311 | 0.19343661 |
| GO: 0042073~intraciliary transport                                                                    | 3     | 0.02328684 | 1          |
| GO: 0005929~cilium                                                                                    | 6     | 0.02622916 | 0.44898151 |
| Annotation Cluster 7: Enrichment Score: 1.2170182899365116                                            |       |            |            |
| Term                                                                                                  | Count | PValue     | Benjamini  |
| GO: 0019216~regulation of lipid metabolic process                                                     | 4     | 0.00293104 | 0.66330982 |
| GO: 0042752~regulation of circadian rhythm                                                            | 3     | 0.08129563 | 1          |

**Table S2. Functional annotation clustering of HCT116 structural-related intra-chromosomal PPIs.**

| Annotation Cluster 1: Enrichment Score: 18.886710115925517                         |          |            |
|------------------------------------------------------------------------------------|----------|------------|
| Term                                                                               | PValue   | Benjamini  |
| GO: 0007156~homophilic cell adhesion via plasma membrane adhesion molecules        | 7.08E-39 | 1.38E-35   |
| GO: 0007399~nervous system development                                             | 5.72E-17 | 5.59E-14   |
| GO: 0007155~cell adhesion                                                          | 1.66E-15 | 1.08E-12   |
| GO: 0005509~calcium ion binding                                                    | 1.07E-14 | 6.82E-12   |
| GO: 0005887~integral component of plasma membrane                                  | 5.09E-12 | 2.37E-09   |
|                                                                                    |          |            |
| Annotation Cluster 2: Enrichment Score: 5.486720966179876                          |          |            |
| Term                                                                               | PValue   | Benjamini  |
| hsa05320: Autoimmune thyroid disease                                               | 8.92E-19 | 2.45E-16   |
| GO: 0002323~natural killer cell activation involved in immune response             | 1.09E-10 | 5.32E-08   |
| hsa05169: Epstein-Barr virus infection                                             | 4.37E-10 | 6.01E-08   |
| GO: 0005132~type I interferon receptor binding                                     | 2.03E-09 | 6.44E-07   |
| hsa05152: Tuberculosis                                                             | 8.01E-09 | 3.96E-07   |
| GO: 0033141~positive regulation of peptidyl-serine phosphorylation of STAT protein | 1.02E-08 | 3.98E-06   |
| hsa05164: Influenza A                                                              | 1.78E-08 | 5.91E-07   |
| hsa05163: Human cytomegalovirus infection                                          | 1.93E-08 | 5.91E-07   |
| hsa05168: Herpes simplex virus 1 infection                                         | 5.62E-08 | 1.54E-06   |
| GO: 0002286~T cell activation involved in immune response                          | 7.08E-08 | 2.18E-05   |
| GO: 0006959~humoral immune response                                                | 1.07E-07 | 2.61E-05   |
| GO: 0019221~cytokine-mediated signaling pathway                                    | 5.31E-07 | 1.01E-04   |
| hsa04623: Cytosolic DNA-sensing pathway                                            | 5.84E-07 | 1.46E-05   |
| GO: 0042100~B cell proliferation                                                   | 6.20E-07 | 1.01E-04   |
| GO: 0060337~type I interferon signaling pathway                                    | 6.20E-07 | 1.01E-04   |
| hsa05170: Human immunodeficiency virus 1 infection                                 | 6.38E-07 | 1.46E-05   |
| hsa05167: Kaposi sarcoma-associated herpesvirus infection                          | 6.93E-07 | 1.47E-05   |
| GO: 0043330~response to exogenous dsRNA                                            | 7.02E-07 | 1.05E-04   |
| hsa05165: Human papillomavirus infection                                           | 1.66E-06 | 3.26E-05   |
| hsa04650: Natural killer cell mediated cytotoxicity                                | 4.93E-06 | 8.47E-05   |
| hsa05162: Measles                                                                  | 1.55E-05 | 2.37E-04   |
| GO: 0051607~defense response to virus                                              | 2.19E-05 | 0.00237571 |
| GO: 0030183~B cell differentiation                                                 | 2.44E-05 | 0.0025043  |
| hsa04622: RIG-I-like receptor signaling pathway                                    | 8.08E-05 | 0.00105761 |
| hsa05161: Hepatitis B                                                              | 8.57E-05 | 0.00107156 |
| GO: 0002250~adaptive immune response                                               | 1.05E-04 | 0.00972708 |



| hsa05200: Pathways in cancer                                                                          | 1.24E-04   | 0.00148135 |
|-------------------------------------------------------------------------------------------------------|------------|------------|
| GO: 0098586~cellular response to virus                                                                | 1.42E-04   | 0.01258975 |
| hsa04217: Necroptosis                                                                                 | 2.67E-04   | 0.00271968 |
| hsa04620: Toll-like receptor signaling pathway                                                        | 3.80E-04   | 0.00373633 |
| hsa05417: Lipid and atherosclerosis                                                                   | 5.11E-04   | 0.00484296 |
| hsa05160: Hepatitis C                                                                                 | 8.40E-04   | 0.00745575 |
| hsa04936: Alcoholic liver disease                                                                     | 0.00123367 | 0.01028057 |
| GO: 0005125~cytokine activity                                                                         | 0.00232746 | 0.21113399 |
| hsa04630: JAK-STAT signaling pathway                                                                  | 0.00350412 | 0.02604415 |
| hsa04060: Cytokine-cytokine receptor interaction                                                      | 0.00466886 | 0.03292144 |
| hsa04151: PI3K-Akt signaling pathway                                                                  | 0.00537873 | 0.0369788  |
| hsa05171: Coronavirus disease - COVID-19                                                              | 0.00802705 | 0.05133577 |
| hsa04621: NOD-like receptor signaling pathway                                                         | 0.00900205 | 0.05626278 |
| GO: 0005126~cytokine receptor binding                                                                 | 0.01312996 | 0.75795707 |
| Annotation Cluster 3: Enrichment Score: 4.299091183648573                                             |            |            |
| Term                                                                                                  | PValue     | Benjamini  |
| hsa05320: Autoimmune thyroid disease                                                                  | 8.92E-19   | 2.45E-16   |
| GO: 0071556~integral component of luminal side of endoplasmic reticulum membrane                      | 3.08E-10   | 7.16E-08   |
| hsa05330: Allograft rejection                                                                         | 2.03E-09   | 1.86E-07   |
| hsa05332: Graft-versus-host disease                                                                   | 6.58E-09   | 3.96E-07   |
| hsa04940: Type I diabetes mellitus                                                                    | 8.64E-09   | 3.96E-07   |
| GO: 0042605~peptide antigen binding                                                                   | 1.09E-08   | 2.30E-06   |
| hsa04612: Antigen processing and presentation                                                         | 1.11E-08   | 4.37E-07   |
| GO: 0042613~MHC class II protein complex                                                              | 5.37E-08   | 8.32E-06   |
| GO: 0019882~antigen processing and presentation                                                       | 7.82E-08   | 2.18E-05   |
| GO: 0002504~antigen processing and presentation of peptide or polysaccharide antigen via MHC class II | 1.75E-07   | 3.79E-05   |
| GO: 0032395~MHC class II receptor activity                                                            | 2.70E-07   | 4.28E-05   |
| GO: 0002503~peptide antigen assembly with MHC class II protein complex                                | 8.60E-07   | 1.20E-04   |
| GO: 0002381~immunoglobulin production involved in immunoglobulin mediated immune response             | 1.30E-06   | 1.70E-04   |
| hsa05416: Viral myocarditis                                                                           | 3.00E-06   | 5.50E-05   |
| GO: 0012507~ER to Golgi transport vesicle membrane                                                    | 3.18E-06   | 2.95E-04   |
| GO: 0019886~antigen processing and presentation of exogenous peptide antigen via MHC class II         | 3.77E-06   | 4.60E-04   |
| hsa04145: Phagosome                                                                                   | 9.83E-06   | 1.59E-04   |
| hsa05166: Human T-cell leukemia virus 1 infection                                                     | 1.99E-05   | 2.87E-04   |
| GO: 0023026~MHC class II protein complex binding                                                      | 3.50E-05   | 0.00444635 |

|                                                                                                                               |            |            |
|-------------------------------------------------------------------------------------------------------------------------------|------------|------------|
| hsa05150: Staphylococcus aureus infection                                                                                     | 3.91E-05   | 5.38E-04   |
| GO: 0050870~positive regulation of T cell activation                                                                          | 8.58E-05   | 0.00838156 |
| hsa05310: Asthma                                                                                                              | 1.29E-04   | 0.00148193 |
| GO: 0030666~endocytic vesicle membrane                                                                                        | 1.55E-04   | 0.01200662 |
| hsa05145: Toxoplasmosis                                                                                                       | 1.61E-04   | 0.00177432 |
| hsa05140: Leishmaniasis                                                                                                       | 1.71E-04   | 0.00180795 |
| GO: 0005765~lysosomal membrane                                                                                                | 2.22E-04   | 0.0147493  |
| GO: 0006955~immune response                                                                                                   | 3.83E-04   | 0.03118785 |
| GO: 0002486~antigen processing and presentation of endogenous peptide antigen via MHC class I via ER pathway, TAP-independent | 5.93E-04   | 0.046337   |
| GO: 0042612~MHC class I protein complex                                                                                       | 7.87E-04   | 0.04053694 |
| hsa04514: Cell adhesion molecules                                                                                             | 8.40E-04   | 0.00745575 |
| GO: 0000139~Golgi membrane                                                                                                    | 0.00109335 | 0.04621875 |
| hsa04640: Hematopoietic cell lineage                                                                                          | 0.00111535 | 0.00958507 |
| hsa05321: Inflammatory bowel disease                                                                                          | 0.00148522 | 0.01201284 |
| hsa04672: Intestinal immune network for IgA production                                                                        | 0.00165846 | 0.01303076 |
| GO: 0030658~transport vesicle membrane                                                                                        | 0.00190334 | 0.06808101 |
| hsa05322: Systemic lupus erythematosus                                                                                        | 0.00299623 | 0.02288785 |
| GO: 0001916~positive regulation of T cell mediated cytotoxicity                                                               | 0.00301056 | 0.22613968 |
| GO: 0030670~phagocytic vesicle membrane                                                                                       | 0.00555792 | 0.15684631 |
| hsa04659: Th17 cell differentiation                                                                                           | 0.00734264 | 0.04807682 |
| hsa04658: Th1 and Th2 cell differentiation                                                                                    | 0.01032726 | 0.06173908 |
| hsa05323: Rheumatoid arthritis                                                                                                | 0.01092655 | 0.06393195 |
| GO: 0030669~clathrin-coated endocytic vesicle membrane                                                                        | 0.01841431 | 0.42813264 |
| GO: 0010008~endosome membrane                                                                                                 | 0.05188268 | 0.86361666 |
| GO: 0031901~early endosome membrane                                                                                           | 0.05200272 | 0.86361666 |
| GO: 0055038~recycling endosome membrane                                                                                       | 0.07280561 | 1          |
| GO: 0032588~trans-Golgi network membrane                                                                                      | 0.07280561 | 1          |
| GO: 0050852~T cell receptor signaling pathway                                                                                 | 0.24866213 | 1          |
| hsa05203: Viral carcinogenesis                                                                                                | 0.28823311 | 1          |
| hsa04218: Cellular senescence                                                                                                 | 0.38971633 | 1          |
| hsa04144: Endocytosis                                                                                                         | 0.49025631 | 1          |
| Annotation Cluster 4: Enrichment Score: 2.5719744078830575                                                                    |            |            |
| Term                                                                                                                          | PValue     | Benjamini  |
| GO: 0016339~calcium-dependent cell-cell adhesion via plasma membrane cell adhesion molecules                                  | 4.69E-06   | 5.39E-04   |
| GO: 0007416~synapse assembly                                                                                                  | 1.79E-04   | 0.015208   |
| GO: 0007268~chemical synaptic transmission                                                                                    | 0.12291758 | 1          |

|                                                                                                               |            |            |
|---------------------------------------------------------------------------------------------------------------|------------|------------|
| GO: 0045202~synapse                                                                                           | 0.49932314 | 1          |
| Annotation Cluster 5: Enrichment Score: 1.3966018993019305                                                    |            |            |
| Term                                                                                                          | PValue     | Benjamini  |
| hsa00480: Glutathione metabolism                                                                              | 0.00361814 | 0.02618394 |
| GO: 0004364~glutathione transferase activity                                                                  | 0.00366572 | 0.29096645 |
| hsa05204: Chemical carcinogenesis - DNA adducts                                                               | 0.00922531 | 0.05637689 |
| GO: 0006749~glutathione metabolic process                                                                     | 0.02149396 | 1          |
| hsa00982: Drug metabolism - cytochrome P450                                                                   | 0.04022589 | 0.22124239 |
| hsa01524: Platinum drug resistance                                                                            | 0.04229977 | 0.22808699 |
| hsa05207: Chemical carcinogenesis - receptor activation                                                       | 0.05243462 | 0.27729846 |
| hsa00980: Metabolism of xenobiotics by cytochrome P450                                                        | 0.0536251  | 0.27824345 |
| hsa00983: Drug metabolism - other enzymes                                                                     | 0.05860336 | 0.29301679 |
| GO: 0006805~xenobiotic metabolic process                                                                      | 0.07181652 | 1          |
| GO: 0042178~xenobiotic catabolic process                                                                      | 0.09474298 | 1          |
| hsa05225: Hepatocellular carcinoma                                                                            | 0.15260351 | 0.68796663 |
| hsa05418: Fluid shear stress and atherosclerosis                                                              | 0.15821423 | 0.69977247 |
| hsa05208: Chemical carcinogenesis - reactive oxygen species                                                   | 0.23136469 | 0.92210563 |
| Annotation Cluster 6: Enrichment Score: 1.3570585896445353                                                    |            |            |
| Term                                                                                                          | PValue     | Benjamini  |
| GO: 0045869~negative regulation of single stranded viral RNA replication via double stranded DNA intermediate | 0.00518358 | 0.33745123 |
| GO: 0010529~negative regulation of transposition                                                              | 0.01639338 | 0.89908234 |
| GO: 0070383~DNA cytosine deamination                                                                          | 0.02040899 | 0.99646883 |
| GO: 0047844~deoxycytidine deaminase activity                                                                  | 0.02262817 | 1          |
| GO: 0009972~cytidine deamination                                                                              | 0.02905456 | 1          |
| GO: 0016554~cytidine to uridine editing                                                                       | 0.02905456 | 1          |
| GO: 0004126~cytidine deaminase activity                                                                       | 0.03216004 | 1          |
| GO: 0080111~DNA demethylation                                                                                 | 0.08096562 | 1          |
| hsa03250: Viral life cycle - HIV-1                                                                            | 0.49555146 | 1          |
| GO: 0000932~P-body                                                                                            | 0.62879617 | 1          |
| Annotation Cluster 7: Enrichment Score: 1.2134687565396018                                                    |            |            |
| Term                                                                                                          | PValue     | Benjamini  |
| GO: 0045324~late endosome to vacuole transport                                                                | 0.01657295 | 0.89908234 |
| GO: 0097352~autophagosome maturation                                                                          | 0.06918992 | 1          |
| GO: 0016236~macroautophagy                                                                                    | 0.1995957  | 1          |

**Table S3. Functional annotation clustering of HCT116 structural-related intra-chromosomal PPIs.**

| Annotation Cluster 1: Enrichment Score: 2.943527846030514        |            |            |
|------------------------------------------------------------------|------------|------------|
| Term                                                             | PValue     | Benjamini  |
| GO: 0000502~proteasome complex                                   | 1.47E-06   | 1.74E-04   |
| hsa03050: Proteasome                                             | 6.92E-04   | 0.043804   |
| GO: 0022624~proteasome accessory complex                         | 0.0066303  | 0.1380662  |
| hsa05017: Spinocerebellar ataxia                                 | 0.24932119 | 0.99411035 |
|                                                                  |            |            |
| Annotation Cluster 2: Enrichment Score: 2.5665692443489947       |            |            |
| Term                                                             | PValue     | Benjamini  |
| GO: 0042765~GPI-anchor transamidase complex                      | 9.14E-04   | 0.03595721 |
| GO: 0016255~attachment of GPI anchor to protein                  | 0.00185364 | 0.55531848 |
| hsa00563: Glycosylphosphatidylinositol (GPI)-anchor biosynthesis | 0.01178264 | 0.22179084 |
|                                                                  |            |            |
| Annotation Cluster 3: Enrichment Score: 2.4423007751503065       |            |            |
| Term                                                             | PValue     | Benjamini  |
| GO: 0008380~RNA splicing                                         | 2.54E-06   | 0.00457121 |
| hsa03040: Spliceosome                                            | 1.25E-04   | 0.01331879 |
| GO: 0000398~mRNA splicing, via spliceosome                       | 0.00136178 | 0.49401419 |
| GO: 0005681~spliceosomal complex                                 | 0.00175958 | 0.05662648 |
| GO: 0071013~catalytic step 2 spliceosome                         | 0.00260104 | 0.07082841 |
| GO: 0071005~U2-type precatalytic spliceosome                     | 0.00771117 | 0.15598591 |
| GO: 0071007~U2-type catalytic step 2 spliceosome                 | 0.01130191 | 0.20517311 |
| GO: 0000375~RNA splicing, via transesterification reactions      | 0.11039709 | 1          |
| GO: 0005682~U5 snRNP                                             | 0.11623505 | 0.86190502 |
| GO: 0046540~U4/U6 x U5 tri-snRNP complex                         | 0.17059402 | 0.9309836  |
|                                                                  |            |            |
| Annotation Cluster 4: Enrichment Score: 2.3608515879841923       |            |            |
| Term                                                             | PValue     | Benjamini  |
| GO: 0030141~secretory granule                                    | 1.78E-04   | 0.0104911  |
| GO: 0004252~serine-type endopeptidase activity                   | 0.01734523 | 0.95171215 |
| GO: 0008236~serine-type peptidase activity                       | 0.02680996 | 1          |
|                                                                  |            |            |
| Annotation Cluster 5: Enrichment Score: 2.1495169142708916       |            |            |
| Term                                                             | PValue     | Benjamini  |
| GO: 0071051~polyadenylation-dependent snoRNA 3'-end processing   | 1.51E-04   | 0.1354518  |
| GO: 0034475~U4 snRNA 3'-end processing                           | 2.90E-04   | 0.20444477 |

|                                                                                                                 |            |            |
|-----------------------------------------------------------------------------------------------------------------|------------|------------|
| GO: 0000177~cytoplasmic exosome (RNase complex)                                                                 | 2.93E-04   | 0.01480803 |
| GO: 0045006~DNA deamination                                                                                     | 3.98E-04   | 0.20444477 |
| GO: 0000178~exosome (RNase complex)                                                                             | 5.91E-04   | 0.02791445 |
| GO: 0101019~nucleolar exosome (RNase complex)                                                                   | 7.58E-04   | 0.033306   |
| GO: 0034427~nuclear-transcribed mRNA catabolic process, exonucleolytic, 3'-5'                                   | 8.07E-04   | 0.36271775 |
| GO: 0000176~nuclear exosome (RNase complex)                                                                     | 0.00165804 | 0.05662648 |
| GO: 0016075~rRNA catabolic process                                                                              | 0.00558333 | 0.8519673  |
| GO: 0043928~exonucleolytic nuclear-transcribed mRNA catabolic process involved in deadenylation-dependent decay | 0.02071858 | 1          |
| GO: 0006401~RNA catabolic process                                                                               | 0.02274463 | 1          |
| GO: 0035327~transcriptionally active chromatin                                                                  | 0.02293376 | 0.31837454 |
| GO: 0071028~nuclear mRNA surveillance                                                                           | 0.06364649 | 1          |
| hsa03018: RNA degradation                                                                                       | 0.06393924 | 0.60178111 |
| GO: 0000175~3'-5'-exoribonuclease activity                                                                      | 0.07306224 | 1          |
| GO: 0000791~euchromatin                                                                                         | 0.16498087 | 0.9309836  |
| GO: 0090503~RNA phosphodiester bond hydrolysis, exonucleolytic                                                  | 0.22541777 | 1          |
| GO: 0006396~RNA processing                                                                                      | 0.99805831 | 1          |
| Annotation Cluster 6: Enrichment Score: 1.9218679321185945                                                      |            |            |
| Term                                                                                                            | PValue     | Benjamini  |
| GO: 0044183~protein binding involved in protein folding                                                         | 0.00113455 | 0.23666785 |
| GO: 0051082~unfolded protein binding                                                                            | 0.03069127 | 1          |
| GO: 0006457~protein folding                                                                                     | 0.04926703 | 1          |
| Annotation Cluster 7: Enrichment Score: 1.7774390184940738                                                      |            |            |
| Term                                                                                                            | PValue     | Benjamini  |
| hsa05020: Prion disease                                                                                         | 0.00703128 | 0.20136586 |
| hsa05014: Amyotrophic lateral sclerosis                                                                         | 0.00818049 | 0.20136586 |
| hsa05012: Parkinson disease                                                                                     | 0.00975062 | 0.22157805 |
| hsa05022: Pathways of neurodegeneration - multiple diseases                                                     | 0.01038647 | 0.22157805 |
| hsa05016: Huntington disease                                                                                    | 0.02612139 | 0.34828525 |
| hsa05010: Alzheimer disease                                                                                     | 0.14225106 | 0.8128632  |
