# Supplementary material for: Diffusion-enhanced characterization of 3D chromatin structure reveals its linkage to gene regulatory networks and the interactome
Source: PubMed Central journal article supplement — Genome Res. 2023 Aug;33(8):1354–68. doi: 10.1101/gr.277737.123 (PMC10547250; doi:10.1101/gr.277737.123), 2023-08
Supplement: Supplemental_Fig_S15.pdf [file Supplemental_Fig_S15.pdf]

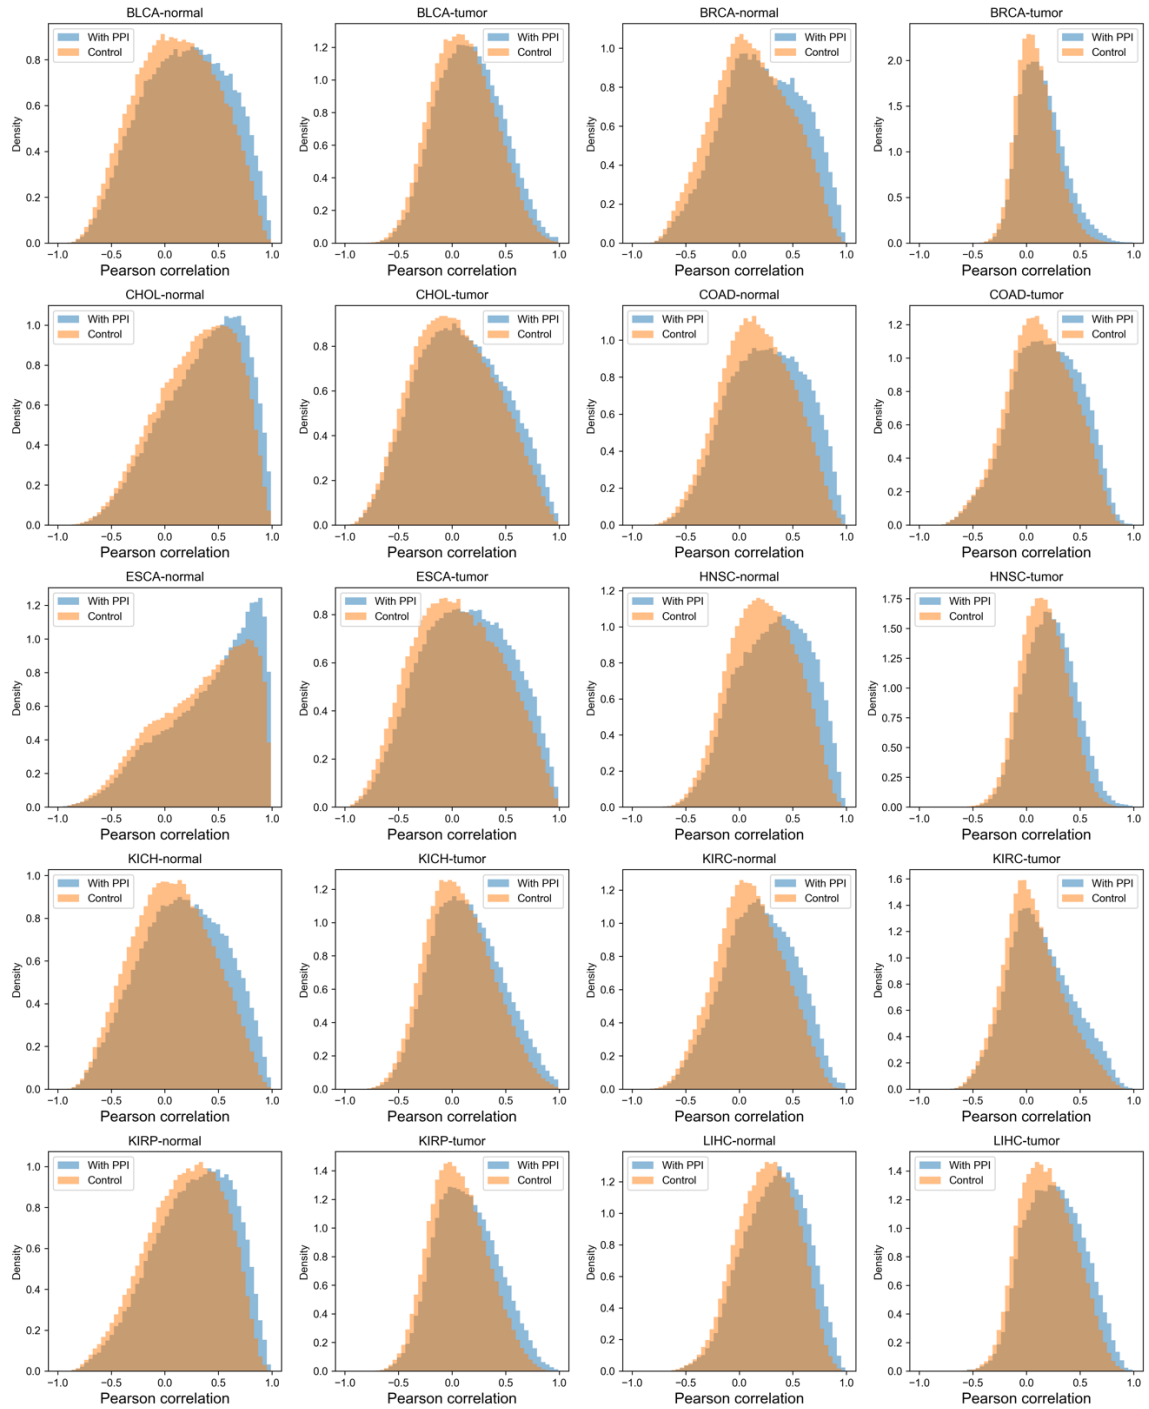

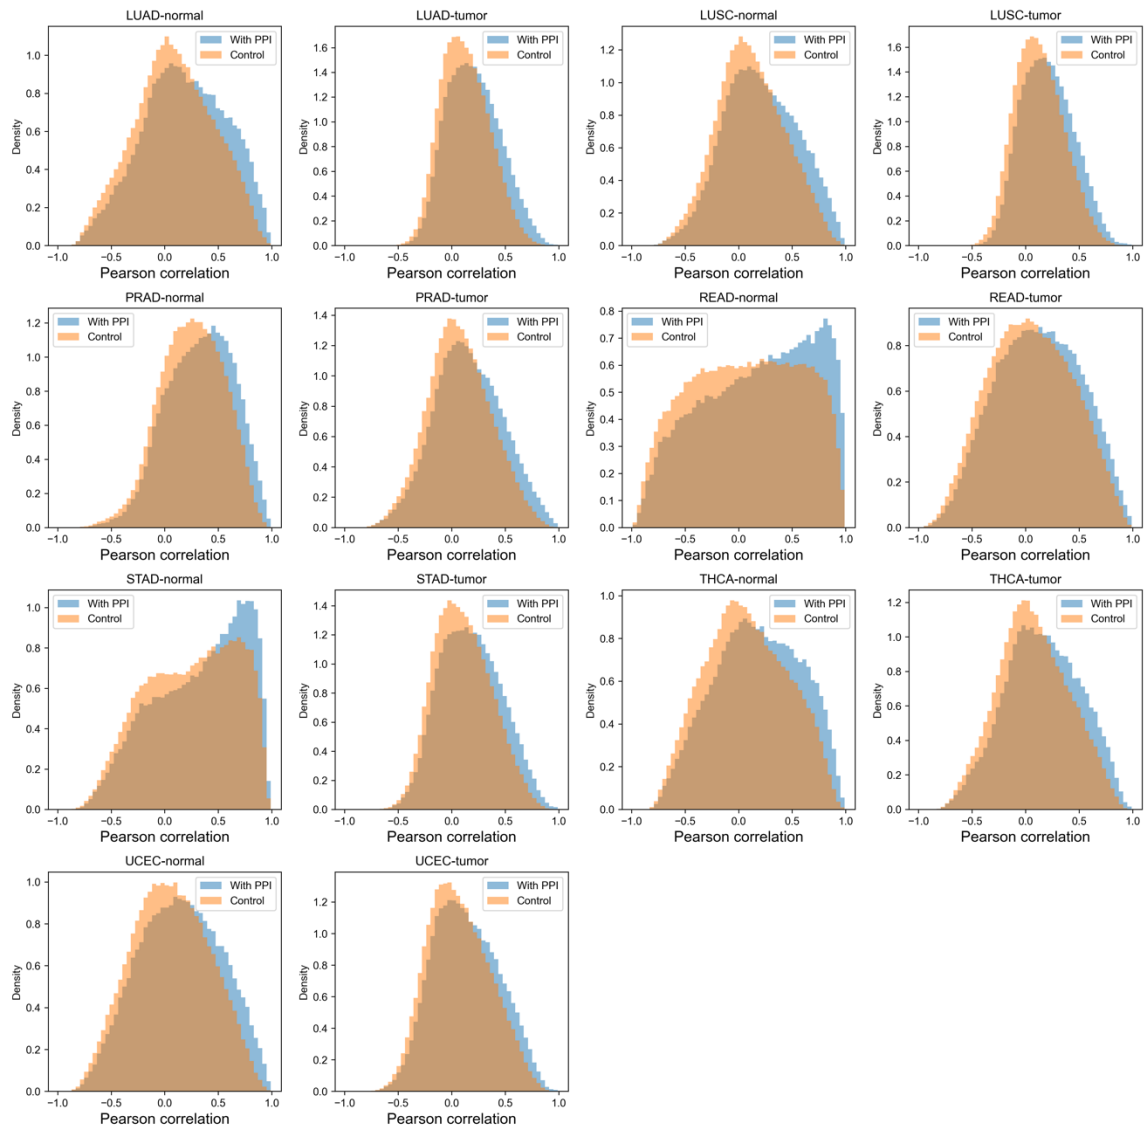

**Supplemental Fig S15. The distribution of RNA correlation with STRING PPI for 17 cancer types.** The distributions of gene pairs with STRING PPI are colored blue and the control groups are colored orange. All samples show similar patterns that gene pairs with STRING PPI are more correlated at transcriptional level.
