# Supplementary material for: Diffusion-enhanced characterization of 3D chromatin structure reveals its linkage to gene regulatory networks and the interactome
Source: PubMed Central journal article supplement — Genome Res. 2023 Aug;33(8):1354–68. doi: 10.1101/gr.277737.123 (PMC10547250; doi:10.1101/gr.277737.123), 2023-08
Supplement: Supplemental_Fig_S16.pdf [file Supplemental_Fig_S16.pdf]

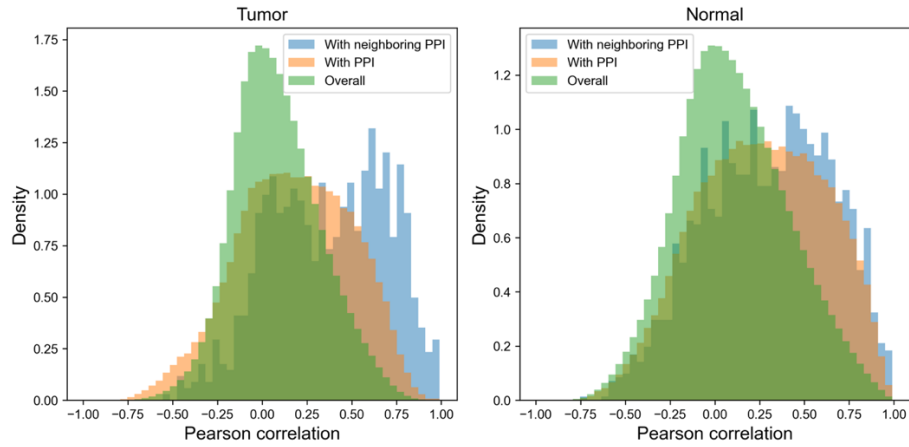

**Supplemental Fig S16. The distribution of RNA correlation for colon cancer.** Gene pairs with both STRING PPI and GGIs are colored blue and gene pairs with only STRING PPI are colored orange and the control group is colored green. Gene-pairs with both STRING PPI and GGIs are more correlated in transcriptional level for both tumor and normal colon samples.
