# Supplementary material for: Diffusion-enhanced characterization of 3D chromatin structure reveals its linkage to gene regulatory networks and the interactome
Source: PubMed Central journal article supplement — Genome Res. 2023 Aug;33(8):1354–68. doi: 10.1101/gr.277737.123 (PMC10547250; doi:10.1101/gr.277737.123), 2023-08
Supplement: Supplemental_Fig_S17.pdf [file Supplemental_Fig_S17.pdf]

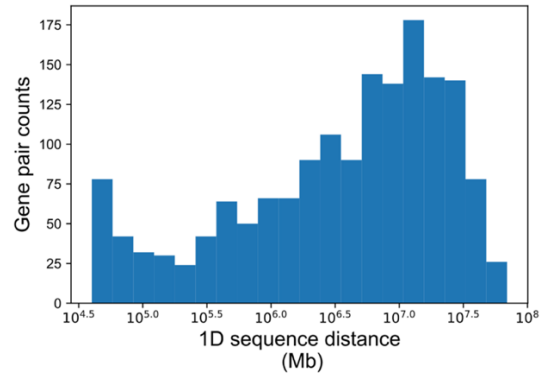

**Supplemental Fig S17.** The distribution of 1D sequence distance of gene pairs integrating gene-gene interplay at DNA, RNA, and protein levels.
