# Supplementary material for: Diffusion-enhanced characterization of 3D chromatin structure reveals its linkage to gene regulatory networks and the interactome
Source: PubMed Central journal article supplement — Genome Res. 2023 Aug;33(8):1354–68. doi: 10.1101/gr.277737.123 (PMC10547250; doi:10.1101/gr.277737.123), 2023-08
Supplement: Supplemental_Methods_HS.pdf [file Supplemental_Methods_HS.pdf]

## Supplemental Methods

### Overall design of C<sub>T</sub>G

The Hi-C contact map depicts a proximity network  $G(V,E)$ , where the vertices  $V=\{v_1, v_2, \dots, v_n\}$  denote the non-overlapping genomic regions and the edges  $E = \{e_{i,j}\}$  denote the contact strength between pairwise connected genomic regions. Similar to diffusion-based methods for network denoising (1, 2), a Markov process (3) is used to describe the diffusion process on this network.  $D_{i,i} = \sum_{j=1}^n e_{i,j}$ , is the element of the diagonal degree matrix  $D$  for the network. The vector  $P_i^{(1)} = \{P_{i,1}^{(1)}, P_{i,2}^{(1)}, \dots, P_{i,n}^{(1)}\}$  is the conditional transition probability transiting from vertex  $v_i$  to  $V=\{v_1, v_2, \dots, v_n\}$  in one single step. Likewise,  $P_i^{(k)} = \{P_{i,1}^{(k)}, P_{i,2}^{(k)}, \dots, P_{i,n}^{(k)}\}$  is the conditional transition probability in  $k$  steps and  $P_{i,j}^{(k)} = \sum_{p=1}^n P_{i,p}^{(k-1)} P_{p,j}^{(k-1)}$ . With increasing  $k$ , the transition probability from  $v_i$  to  $v_j$  gradually integrates neighbor information and expand the inclusion of edges, since  $v_i$  and  $v_j$  may not be connected in one step but they can be connected in some finite steps as the network  $G$  is a connected graph. Taking  $k=2$  and  $P_{i,j}^{(2)} = \sum_{p=1}^n P_{i,p}^{(1)} P_{p,j}^{(1)}$  as an example, when the two pairs of vertices ( $v_i$  and  $v_p$ ,  $v_j$  and  $v_p$ ) are pairwise neighbors, which means  $P_{i,p}^{(1)} \neq 0$  and  $P_{p,j}^{(1)} \neq 0$ ,  $v_p$  contributes to  $P_{i,j}^{(2)}$ .  $P_i^{(k)}$  converges to an invariant distribution for connected graph and the difference between  $P_i^{(k-1)}$  and  $P_i^{(k)}$  decreases.

It is thus appropriate to use the integrated information on  $\{P_i^{(1)}, P_i^{(2)}, \dots, P_i^{(k)}\}$  to describe the diffusion manner of vertex  $v_i$  within some given number of  $k$  steps, which can be infinite. In practice, we found that  $P_i^{(k)}$  converges rapidly and therefore used the exponential decay to fit the convergence.  $S_i^{(k)}$  is defined as the weighted summation of  $P_i^{(t)}$  ( $1 \leq t \leq k$ ) :

$$S_i^{(k)} = \sum_{t=1}^k \exp(-\alpha t) P_i^{(t)}$$

When  $k$  reaches infinity,  $S_i^{(k)}$  converges to  $S_i$  (Supplementary note). As the weighted summation of  $P_i^{(t)}$ ,  $S_i$  naturally integrates neighbor information of the connected graph and therefore alleviates in a physics-based manner the problems caused by the Hi-C

data sparsity. On the other hand, the exponential decay ensures that the integration does not eliminate the distinction of each vertex, taking the rapid convergence of  $P_i^{(k)}$  into consideration.

The physical succession of the genomic structure suggests that the proximal genomic regions should share similar diffusion manners. The similarity between pairwise vertices  $v_i$  and  $v_j$  is quantified by L1 distance between  $S_i$  and  $S_j$ . L1 distance is used as a measure since it mitigates the impact of outliers caused by distance matrices of higher-order terms. A C<sub>T</sub>G distance matrix is then constructed based on the Hi-C contact map.

### Proof 1

Eigenvalues  $\Lambda$  of the P are within the range of [-1,1].

For any eigenvector X of P:

$$PX = \lambda X$$

The maximum element of X is denoted as  $x_{max}$ , and the minimum element of X is denoted as  $x_{min}$ . As the row summation of P is normalized to 1, and P is positive,

$$\begin{aligned} x_{min} &\leq \lambda x_{min} \leq x_{max} \\ x_{min} &\leq \lambda x_{max} \leq x_{max} \end{aligned}$$

Therefore,

$$-1 \leq \lambda x_{max} \leq 1$$

### Proof 2

When n approaches infinity, the transition propensity matrix  $M^{(n)}$  is convergent. P is diagonalizable:

$$P(\vec{v}_1, \vec{v}_2, \dots, \vec{v}_m) = (\lambda_1 \vec{v}_1, \lambda_2 \vec{v}_2, \dots, \lambda_m \vec{v}_m) = (\vec{v}_1, \vec{v}_2, \dots, \vec{v}_m) \begin{bmatrix} \lambda_1 & \dots & 0 \\ \vdots & \ddots & \vdots \\ 0 & \dots & \lambda_m \end{bmatrix}$$

$$P^{(1)} = U^{-1} \Lambda U$$

$P^{(k)}$  can be written as:

$$P^{(k)} = P^k = U^{-1} \Lambda U$$

$S^{(n)}$  is the weighted summation of  $P^{(k)}$ :

$$S^{(n)} = \sum_{k=1}^n \exp(-\alpha k) U^{-1} \Lambda^k U = \sum_{k=1}^n U^{-1} [\exp(-\alpha k) \Lambda^k] U$$

According to the associative law of multiplication:

$$S^{(n)} = U^{-1} \sum_{k=1}^n [\exp(-\alpha k) \Lambda^k] U = U^{-1} \left[ \sum_{k=1}^n \exp(-\alpha k) \Lambda^k \right] U$$

When n approaches infinity, we have

$$S = U^{-1} \left[ \lim_{n \rightarrow \infty} \sum_{k=1}^n \exp(-\alpha k) \Lambda^k \right] U$$

In the above equation,  $\exp(-ak) \Lambda^k$  is a geometric progression, and

$$\lim_{n \rightarrow \infty} \exp(-ak) \Lambda^k \rightarrow 0$$

Therefore, the summation over  $\exp(-ak) \Lambda^k$  is convergent when

$$\rho(P) < \exp(a), \rho(P) = \max|\lambda_i|$$

As  $\rho(P) < 1$  and  $\exp(a) > \exp(0) > 1$ :

$$\lim_{n \rightarrow \infty} \sum_{k=1}^n \exp(-ak) \Lambda^k = \Lambda [\exp(a)I - \Lambda]^{-1}$$

$I$  denotes the identity matrix.

$S$  is then also convergent and

$$S = U^{-1} \Lambda [\exp(a)I - \Lambda]^{-1} U$$

1. Wang,B., Pourshafeie,A., Zitnik,M., Zhu,J., Bustamante,C.D., Batzoglou,S. and Leskovec,J. (2018) Network enhancement as a general method to denoise weighted biological networks. *Nat. Commun.*, **9**.
2. Cao,M., Zhang,H., Park,J., Daniels,N.M., Crovella,M.E., Cowen,L.J. and Hescott,B. (2013) Going the Distance for Protein Function Prediction: A New Distance Metric for Protein Interaction Networks. *PLoS One*, **8**, e76339.
3. Stochastic Processes in Physics and Chemistry (2007) Elsevier.
4. Halverson,J.D., Smrek,J., Kremer,K. and Grosberg,A.Y. (2014) From a melt of rings to chromosome territories: The role of topological constraints in genome folding. *Reports Prog. Phys.*, **77**.
5. Lieberman-Aiden,E., van Berkum,N.L., Williams,L., Imakaev,M., Ragozy,T., Telling,A., Amit,I., Lajoie,B.R., Sabo,P.J., Dorschner,M.O., *et al.* (2009) Comprehensive Mapping of Long-Range Interactions Reveals Folding Principles of the Human Genome. *Science*, **326**, 289–293.

## PCR Program

| STEP                 | TEMP | TIME       |
|----------------------|------|------------|
| Pre-extension        | 72°C | 5 minutes  |
| Initial Denaturation | 98°C | 30 seconds |
| 10 Cycles            | 98°C | 10 seconds |
|                      | 65°C | 30 seconds |
|                      | 72°C | 90 seconds |
| Final Extension      | 72°C | 2 minutes  |
| Hold                 | 4°C  | ∞          |
