# Supplementary material for: Diffusion-enhanced characterization of 3D chromatin structure reveals its linkage to gene regulatory networks and the interactome
Source: HighWire-hosted journal article supplement (doi:10.1101/gr.277737.123), 2023-07-25
Supplement: Supplemental_Table_S1.xlsx [file Supplemental_Table_S1.xlsx]

## Sheet: Sheet1
Functional annotation clustering of colon csGGIs.
Annotation Cluster 1: Enrichment Score: 1.5327833580397092
Term	Count	PValue	Benjamini
hsa01521: EGFR tyrosine kinase inhibitor resistance	7	4.63e-05	0.00920864
h_pyk2Pathway: Links between Pyk2 and Map Kinases	5	8.51e-05	0.00802485
h_at1rPathway: Angiotensin II mediated activation of JNK Pathway via Pyk2 dependent signaling	5	0.000165	0.00802485
hsa05219: Bladder cancer	5	0.000355	0.0338329
h_malPathway: Role of MAL in Rho-Mediated Activation of SRF	4	0.000567	0.0160863
hsa04662: B cell receptor signaling pathway	6	0.000577	0.0338329
hsa04012: ErbB signaling pathway	6	0.00068	0.0338329
h_rasPathway: Ras Signaling Pathway	4	0.00101341	0.0196602
hsa04140: Autophagy - animal	7	0.00108928	0.0376425
hsa05231: Choline metabolism in cancer	6	0.00129541	0.0376425
hsa04370: VEGF signaling pathway	5	0.00142489	0.0376425
hsa05205: Proteoglycans in cancer	8	0.00151326	0.0376425
h_sam68Pathway: Regulation of Splicing through Sam68	3	0.00163092	0.0263666
GO: 2000641~regulation of early endosome to late endosome transport	3	0.0017761	0.66331
hsa04810: Regulation of actin cytoskeleton	8	0.00215053	0.0444488
h_erkPathway: Erk1/Erk2 Mapk Signaling pathway	4	0.00223416	0.0309591
hsa04664: Fc epsilon RI signaling pathway	5	0.00241051	0.0444488
hsa05211: Renal cell carcinoma	5	0.00254296	0.0444488
hsa04917: Prolactin signaling pathway	5	0.00268033	0.0444488
hsa05223: Non-small cell lung cancer	5	0.00297021	0.0454671
hsa05220: Chronic myeloid leukemia	5	0.00361302	0.0513564
h_metPathway: Signaling of Hepatocyte Growth Factor Receptor	4	0.00379947	0.0398832
hsa04650: Natural killer cell mediated cytotoxicity	6	0.00389495	0.051673
h_fmlpPathway: fMLP induced chemokine gene expression in HMC-1 cells	4	0.00411167	0.0398832
h_integrinPathway: Integrin Signaling Pathway	4	0.00411167	0.0398832
hsa05210: Colorectal cancer	5	0.00561992	0.0698978
h_cdk5Pathway: Phosphorylation of MEK1 by cdk5/p35 down regulates the MAP kinase pathway	3	0.00586627	0.0517299
hsa04540: Gap junction	5	0.00609515	0.0713491
Annotation Cluster 2: Enrichment Score: 1.5241353790689698
Term	Count	PValue	Benjamini
GO: 0039702~viral budding via host ESCRT complex	3	0.0107231	1
GO: 0036258~multivesicular body assembly	3	0.0206996	1
GO: 0043162~ubiquitin-dependent protein catabolic process via the multivesicular body sorting pathway	3	0.0206996	1
GO: 0090148~membrane fission	3	0.0333041	1
Annotation Cluster 3: Enrichment Score: 1.453480544316328
Term	Count	PValue	Benjamini
KW-0653~Protein transport	12	0.0129563	0.244671
GO: 0015031~protein transport	8	0.0389436	1
KW-0967~Endosome	9	0.0864254	0.799435
Annotation Cluster 4: Enrichment Score: 1.444194122407839
Term	Count	PValue	Benjamini
KW-0648~Protein biosynthesis	6	0.00775783	0.244671
KW-0396~Initiation factor	3	0.0702719	0.719014
GO: 0003743~translation initiation factor activity	3	0.0852895	1
Annotation Cluster 5: Enrichment Score: 1.3130484622630447
Term	Count	PValue	Benjamini
GO: 0051402~neuron apoptotic process	5	0.001971	0.66331
GO: 0043524~negative regulation of neuron apoptotic process	4	0.104795	1
Annotation Cluster 6: Enrichment Score: 1.2661570708970376
Term	Count	PValue	Benjamini
GO: 0097542~ciliary tip	4	0.00441052	0.193437
GO: 0005813~centrosome	11	0.00465311	0.193437
GO: 0042073~intraciliary transport	3	0.0232868	1
GO: 0005929~cilium	6	0.0262292	0.448982
Annotation Cluster 7: Enrichment Score: 1.2170182899365116
Term	Count	PValue	Benjamini
GO: 0019216~regulation of lipid metabolic process	4	0.00293104	0.66331
GO: 0042752~regulation of circadian rhythm	3	0.0812956	1
