# Supplementary material for: Diffusion-enhanced characterization of 3D chromatin structure reveals its linkage to gene regulatory networks and the interactome
Source: HighWire-hosted journal article supplement (doi:10.1101/gr.277737.123), 2023-07-25
Supplement: Supplemental_Table_S2.xlsx [file Supplemental_Table_S2.xlsx]

## Sheet: Sheet1
Functional annotation clustering of HCT116 structural-related intra-chromosomal PPIs.
Annotation Cluster 1: Enrichment Score: 18.886710115925517
Term	PValue	Benjamini
GO: 0007156~homophilic cell adhesion via plasma membrane adhesion molecules	7.08e-39	1.38e-35
GO: 0007399~nervous system development	5.72e-17	5.59e-14
GO: 0007155~cell adhesion	1.66e-15	1.08e-12
GO: 0005509~calcium ion binding	1.07e-14	6.82e-12
GO: 0005887~integral component of plasma membrane	5.09e-12	2.37e-09
Annotation Cluster 2: Enrichment Score: 5.486720966179876
Term	PValue	Benjamini
hsa05320: Autoimmune thyroid disease	8.92e-19	2.45e-16
GO: 0002323~natural killer cell activation involved in immune response	1.09e-10	5.32e-08
hsa05169: Epstein-Barr virus infection	4.37e-10	6.01e-08
GO: 0005132~type I interferon receptor binding	2.03e-09	6.44e-07
hsa05152: Tuberculosis	8.01e-09	3.96e-07
GO: 0033141~positive regulation of peptidyl-serine phosphorylation of STAT protein	1.02e-08	3.98e-06
hsa05164: Influenza A	1.78e-08	5.91e-07
hsa05163: Human cytomegalovirus infection	1.93e-08	5.91e-07
hsa05168: Herpes simplex virus 1 infection	5.62e-08	1.54e-06
GO: 0002286~T cell activation involved in immune response	7.08e-08	2.18e-05
GO: 0006959~humoral immune response	1.07e-07	2.61e-05
GO: 0019221~cytokine-mediated signaling pathway	5.31e-07	0.000101
hsa04623: Cytosolic DNA-sensing pathway	5.84e-07	1.46e-05
GO: 0042100~B cell proliferation	6.2e-07	0.000101
GO: 0060337~type I interferon signaling pathway	6.2e-07	0.000101
hsa05170: Human immunodeficiency virus 1 infection	6.38e-07	1.46e-05
hsa05167: Kaposi sarcoma-associated herpesvirus infection	6.93e-07	1.47e-05
GO: 0043330~response to exogenous dsRNA	7.02e-07	0.000105
hsa05165: Human papillomavirus infection	1.66e-06	3.26e-05
hsa04650: Natural killer cell mediated cytotoxicity	4.93e-06	8.47e-05
hsa05162: Measles	1.55e-05	0.000237
GO: 0051607~defense response to virus	2.19e-05	0.00237571
GO: 0030183~B cell differentiation	2.44e-05	0.0025043
hsa04622: RIG-I-like receptor signaling pathway	8.08e-05	0.00105761
hsa05161: Hepatitis B	8.57e-05	0.00107156
GO: 0002250~adaptive immune response	0.000105	0.00972708
hsa05200: Pathways in cancer	0.000124	0.00148135
GO: 0098586~cellular response to virus	0.000142	0.0125898
hsa04217: Necroptosis	0.000267	0.00271968
hsa04620: Toll-like receptor signaling pathway	0.00038	0.00373633
hsa05417: Lipid and atherosclerosis	0.000511	0.00484296
hsa05160: Hepatitis C	0.00084	0.00745575
hsa04936: Alcoholic liver disease	0.00123367	0.0102806
GO: 0005125~cytokine activity	0.00232746	0.211134
hsa04630: JAK-STAT signaling pathway	0.00350412	0.0260441
hsa04060: Cytokine-cytokine receptor interaction	0.00466886	0.0329214
hsa04151: PI3K-Akt signaling pathway	0.00537873	0.0369788
hsa05171: Coronavirus disease - COVID-19	0.00802705	0.0513358
hsa04621: NOD-like receptor signaling pathway	0.00900205	0.0562628
GO: 0005126~cytokine receptor binding	0.01313	0.757957
Annotation Cluster 3: Enrichment Score: 4.299091183648573
Term	PValue	Benjamini
hsa05320: Autoimmune thyroid disease	8.92e-19	2.45e-16
GO: 0071556~integral component of lumenal side of endoplasmic reticulum membrane	3.08e-10	7.16e-08
hsa05330: Allograft rejection	2.03e-09	1.86e-07
hsa05332: Graft-versus-host disease	6.58e-09	3.96e-07
hsa04940: Type I diabetes mellitus	8.64e-09	3.96e-07
GO: 0042605~peptide antigen binding	1.09e-08	2.3e-06
hsa04612: Antigen processing and presentation	1.11e-08	4.37e-07
GO: 0042613~MHC class II protein complex	5.37e-08	8.32e-06
GO: 0019882~antigen processing and presentation	7.82e-08	2.18e-05
GO: 0002504~antigen processing and presentation of peptide or polysaccharide antigen via MHC class II	1.75e-07	3.79e-05
GO: 0032395~MHC class II receptor activity	2.7e-07	4.28e-05
GO: 0002503~peptide antigen assembly with MHC class II protein complex	8.6e-07	0.00012
GO: 0002381~immunoglobulin production involved in immunoglobulin mediated immune response	1.3e-06	0.00017
hsa05416: Viral myocarditis	3e-06	5.5e-05
GO: 0012507~ER to Golgi transport vesicle membrane	3.18e-06	0.000295
GO: 0019886~antigen processing and presentation of exogenous peptide antigen via MHC class II	3.77e-06	0.00046
hsa04145: Phagosome	9.83e-06	0.000159
hsa05166: Human T-cell leukemia virus 1 infection	1.99e-05	0.000287
GO: 0023026~MHC class II protein complex binding	3.5e-05	0.00444635
hsa05150: Staphylococcus aureus infection	3.91e-05	0.000538
GO: 0050870~positive regulation of T cell activation	8.58e-05	0.00838156
hsa05310: Asthma	0.000129	0.00148193
GO: 0030666~endocytic vesicle membrane	0.000155	0.0120066
hsa05145: Toxoplasmosis	0.000161	0.00177432
hsa05140: Leishmaniasis	0.000171	0.00180795
GO: 0005765~lysosomal membrane	0.000222	0.0147493
GO: 0006955~immune response	0.000383	0.0311878
GO: 0002486~antigen processing and presentation of endogenous peptide antigen via MHC class I via ER pathway, TAP-independent	0.000593	0.046337
GO: 0042612~MHC class I protein complex	0.000787	0.0405369
hsa04514: Cell adhesion molecules	0.00084	0.00745575
GO: 0000139~Golgi membrane	0.00109335	0.0462188
hsa04640: Hematopoietic cell lineage	0.00111535	0.00958507
hsa05321: Inflammatory bowel disease	0.00148522	0.0120128
hsa04672: Intestinal immune network for IgA production	0.00165846	0.0130308
GO: 0030658~transport vesicle membrane	0.00190334	0.068081
hsa05322: Systemic lupus erythematosus	0.00299623	0.0228879
GO: 0001916~positive regulation of T cell mediated cytotoxicity	0.00301056	0.22614
GO: 0030670~phagocytic vesicle membrane	0.00555792	0.156846
hsa04659: Th17 cell differentiation	0.00734264	0.0480768
hsa04658: Th1 and Th2 cell differentiation	0.0103273	0.0617391
hsa05323: Rheumatoid arthritis	0.0109266	0.063932
GO: 0030669~clathrin-coated endocytic vesicle membrane	0.0184143	0.428133
GO: 0010008~endosome membrane	0.0518827	0.863617
GO: 0031901~early endosome membrane	0.0520027	0.863617
GO: 0055038~recycling endosome membrane	0.0728056	1
GO: 0032588~trans-Golgi network membrane	0.0728056	1
GO: 0050852~T cell receptor signaling pathway	0.248662	1
hsa05203: Viral carcinogenesis	0.288233	1
hsa04218: Cellular senescence	0.389716	1
hsa04144: Endocytosis	0.490256	1
Annotation Cluster 4: Enrichment Score: 2.5719744078830575
Term	PValue	Benjamini
GO: 0016339~calcium-dependent cell-cell adhesion via plasma membrane cell adhesion molecules	4.69e-06	0.000539
GO: 0007416~synapse assembly	0.000179	0.015208
GO: 0007268~chemical synaptic transmission	0.122918	1
GO: 0045202~synapse	0.499323	1
Annotation Cluster 5: Enrichment Score: 1.3966018993019305
Term	PValue	Benjamini
hsa00480: Glutathione metabolism	0.00361814	0.0261839
GO: 0004364~glutathione transferase activity	0.00366572	0.290966
hsa05204: Chemical carcinogenesis - DNA adducts	0.00922531	0.0563769
GO: 0006749~glutathione metabolic process	0.021494	1
hsa00982: Drug metabolism - cytochrome P450	0.0402259	0.221242
hsa01524: Platinum drug resistance	0.0422998	0.228087
hsa05207: Chemical carcinogenesis - receptor activation	0.0524346	0.277298
hsa00980: Metabolism of xenobiotics by cytochrome P450	0.0536251	0.278243
hsa00983: Drug metabolism - other enzymes	0.0586034	0.293017
GO: 0006805~xenobiotic metabolic process	0.0718165	1
GO: 0042178~xenobiotic catabolic process	0.094743	1
hsa05225: Hepatocellular carcinoma	0.152604	0.687967
hsa05418: Fluid shear stress and atherosclerosis	0.158214	0.699772
hsa05208: Chemical carcinogenesis - reactive oxygen species	0.231365	0.922106
Annotation Cluster 6: Enrichment Score: 1.3570585896445353
Term	PValue	Benjamini
GO: 0045869~negative regulation of single stranded viral RNA replication via double stranded DNA intermediate	0.00518358	0.337451
GO: 0010529~negative regulation of transposition	0.0163934	0.899082
GO: 0070383~DNA cytosine deamination	0.020409	0.996469
GO: 0047844~deoxycytidine deaminase activity	0.0226282	1
GO: 0009972~cytidine deamination	0.0290546	1
GO: 0016554~cytidine to uridine editing	0.0290546	1
GO: 0004126~cytidine deaminase activity	0.03216	1
GO: 0080111~DNA demethylation	0.0809656	1
hsa03250: Viral life cycle - HIV-1	0.495551	1
GO: 0000932~P-body	0.628796	1
Annotation Cluster 7: Enrichment Score: 1.2134687565396018
Term	PValue	Benjamini
GO: 0045324~late endosome to vacuole transport	0.0165729	0.899082
GO: 0097352~autophagosome maturation	0.0691899	1
GO: 0016236~macroautophagy	0.199596	1
