# Supplementary material for: Diffusion-enhanced characterization of 3D chromatin structure reveals its linkage to gene regulatory networks and the interactome
Source: HighWire-hosted journal article supplement (doi:10.1101/gr.277737.123), 2023-07-25
Supplement: Supplemental_Table_S3.xlsx [file Supplemental_Table_S3.xlsx]

## Sheet: Sheet1
Functional annotation clustering of HCT116 structural-related intra-chromosomal PPIs.
Annotation Cluster 1: Enrichment Score: 2.943527846030514
Term	PValue	Benjamini
GO: 0000502~proteasome complex	1.47e-06	0.000174
hsa03050: Proteasome	0.000692	0.043804
GO: 0022624~proteasome accessory complex	0.0066303	0.138066
hsa05017: Spinocerebellar ataxia	0.249321	0.99411
Annotation Cluster 2: Enrichment Score: 2.5665692443489947
Term	PValue	Benjamini
GO: 0042765~GPI-anchor transamidase complex	0.000914	0.0359572
GO: 0016255~attachment of GPI anchor to protein	0.00185364	0.555318
hsa00563: Glycosylphosphatidylinositol (GPI)-anchor biosynthesis	0.0117826	0.221791
Annotation Cluster 3: Enrichment Score: 2.4423007751503065
Term	PValue	Benjamini
GO: 0008380~RNA splicing	2.54e-06	0.00457121
hsa03040: Spliceosome	0.000125	0.0133188
GO: 0000398~mRNA splicing, via spliceosome	0.00136178	0.494014
GO: 0005681~spliceosomal complex	0.00175958	0.0566265
GO: 0071013~catalytic step 2 spliceosome	0.00260104	0.0708284
GO: 0071005~U2-type precatalytic spliceosome	0.00771117	0.155986
GO: 0071007~U2-type catalytic step 2 spliceosome	0.0113019	0.205173
GO: 0000375~RNA splicing, via transesterification reactions	0.110397	1
GO: 0005682~U5 snRNP	0.116235	0.861905
GO: 0046540~U4/U6 x U5 tri-snRNP complex	0.170594	0.930984
Annotation Cluster 4: Enrichment Score: 2.3608515879841923
Term	PValue	Benjamini
GO: 0030141~secretory granule	0.000178	0.0104911
GO: 0004252~serine-type endopeptidase activity	0.0173452	0.951712
GO: 0008236~serine-type peptidase activity	0.02681	1
Annotation Cluster 5: Enrichment Score: 2.1495169142708916
Term	PValue	Benjamini
GO: 0071051~polyadenylation-dependent snoRNA 3'-end processing	0.000151	0.135452
GO: 0034475~U4 snRNA 3'-end processing	0.00029	0.204445
GO: 0000177~cytoplasmic exosome (RNase complex)	0.000293	0.014808
GO: 0045006~DNA deamination	0.000398	0.204445
GO: 0000178~exosome (RNase complex)	0.000591	0.0279145
GO: 0101019~nucleolar exosome (RNase complex)	0.000758	0.033306
GO: 0034427~nuclear-transcribed mRNA catabolic process, exonucleolytic, 3'-5'	0.000807	0.362718
GO: 0000176~nuclear exosome (RNase complex)	0.00165804	0.0566265
GO: 0016075~rRNA catabolic process	0.00558333	0.851967
GO: 0043928~exonucleolytic nuclear-transcribed mRNA catabolic process involved in deadenylation-dependent decay	0.0207186	1
GO: 0006401~RNA catabolic process	0.0227446	1
GO: 0035327~transcriptionally active chromatin	0.0229338	0.318375
GO: 0071028~nuclear mRNA surveillance	0.0636465	1
hsa03018: RNA degradation	0.0639392	0.601781
GO: 0000175~3'-5'-exoribonuclease activity	0.0730622	1
GO: 0000791~euchromatin	0.164981	0.930984
GO: 0090503~RNA phosphodiester bond hydrolysis, exonucleolytic	0.225418	1
GO: 0006396~RNA processing	0.998058	1
Annotation Cluster 6: Enrichment Score: 1.9218679321185945
Term	PValue	Benjamini
GO: 0044183~protein binding involved in protein folding	0.00113455	0.236668
GO: 0051082~unfolded protein binding	0.0306913	1
GO: 0006457~protein folding	0.049267	1
Annotation Cluster 7: Enrichment Score: 1.7774390184940738
Term	PValue	Benjamini
hsa05020: Prion disease	0.00703128	0.201366
hsa05014: Amyotrophic lateral sclerosis	0.00818049	0.201366
hsa05012: Parkinson disease	0.00975062	0.221578
hsa05022: Pathways of neurodegeneration - multiple diseases	0.0103865	0.221578
hsa05016: Huntington disease	0.0261214	0.348285
hsa05010: Alzheimer disease	0.142251	0.812863
