# Supplementary figures and images for: Diffusion-enhanced characterization of 3D chromatin structure reveals its linkage to gene regulatory networks and the interactome
Source: PubMed Central journal article supplement — Genome Res. 2023 Aug;33(8):1354–68. doi: 10.1101/gr.277737.123 (PMC10547250; doi:10.1101/gr.277737.123), 2023-08

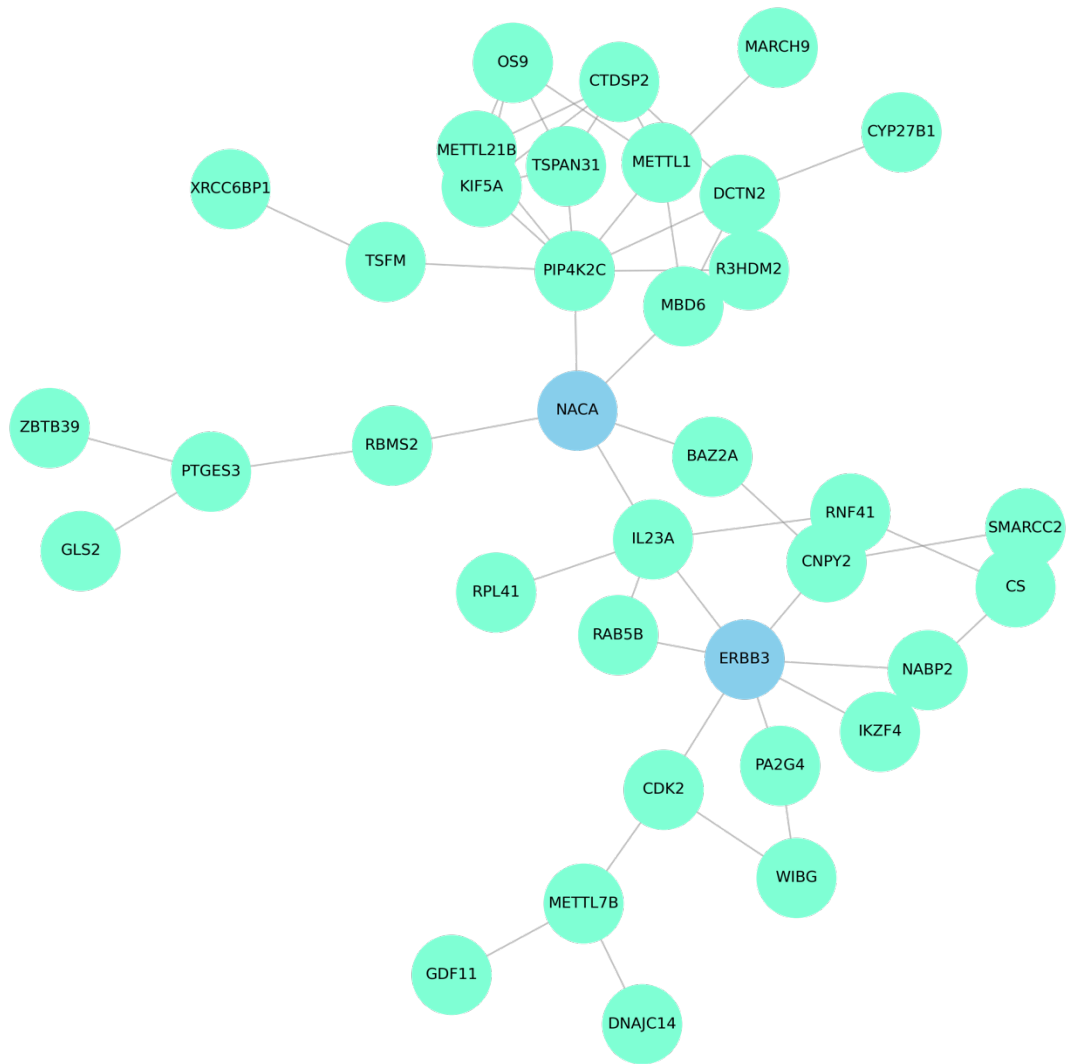

**Supplemental Fig S11. Subgraph of csGGI network with *ERBB3*.**

Supplement: Supplemental_Fig_S11.pdf [file Supplemental_Fig_S11.pdf]

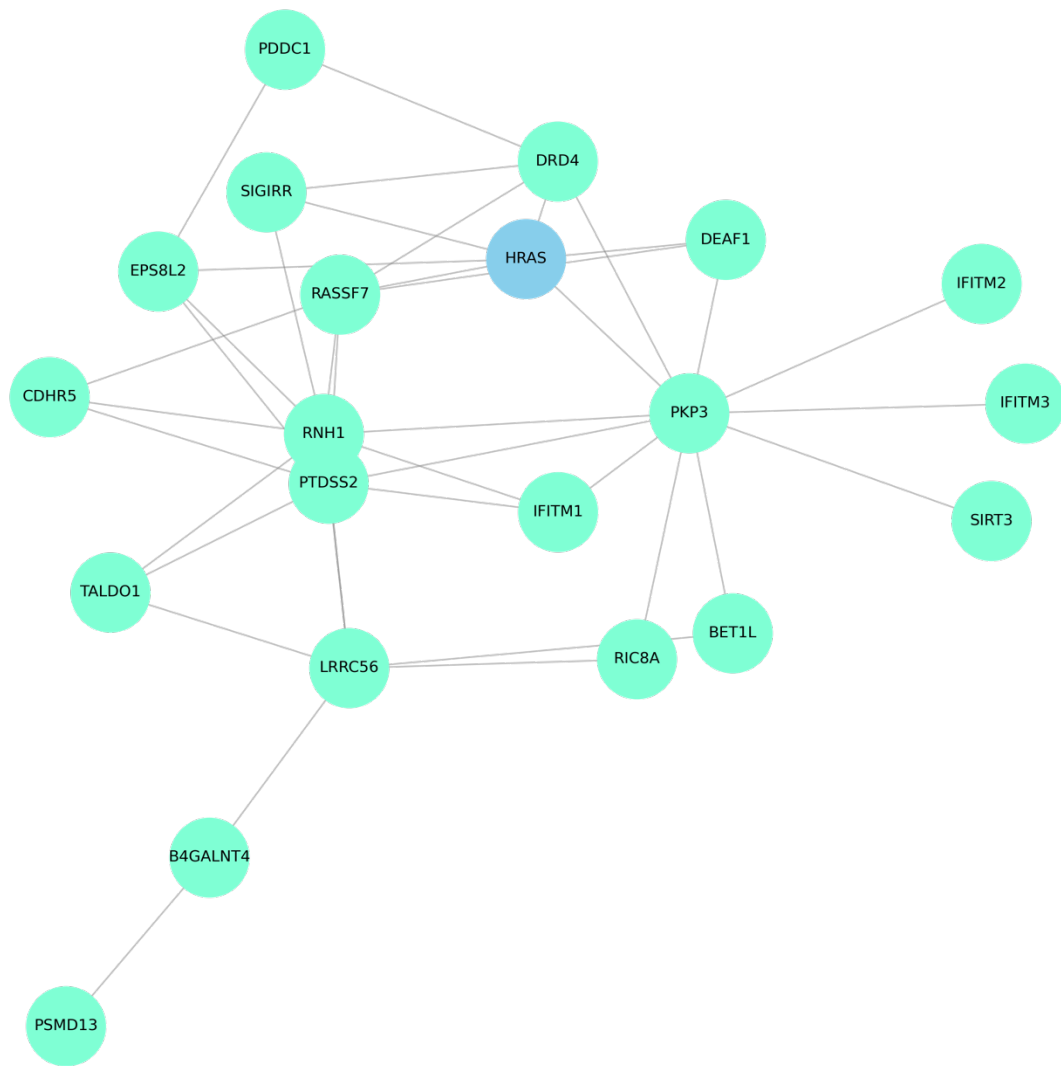

**Supplemental Fig S12. Subgraph of csGGI network with *HRAS*.**

Supplement: Supplemental_Fig_S12.pdf [file Supplemental_Fig_S12.pdf]

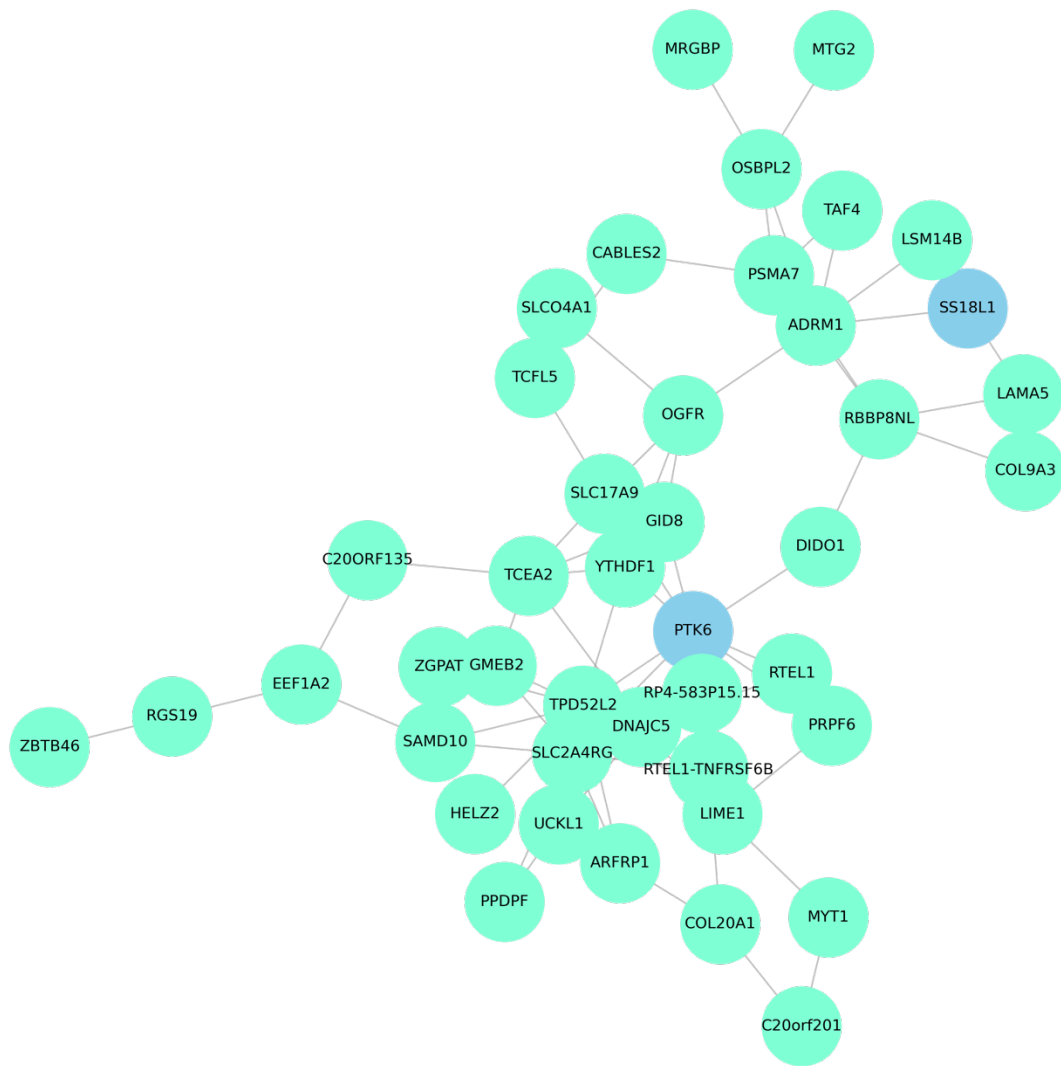

**Supplemental Fig S13. Subgraph of csGGI network with *PTK6*.**

Supplement: Supplemental_Fig_S13.pdf [file Supplemental_Fig_S13.pdf]
